# Supplementary material
Source: PubMed Central journal article supplement (PMC7238381)
Supplement: Supplemental_Material2.pdf [file Supplemental_Material2.pdf]

## Supplementary Materials

### Supplementary Tables.

Table S1. Primer sequences for PCR assays.

Table S2. Distribution and dispersion analyses of brain mRNA changes associated with ischemic stroke.

Table S3. Mouse brain gene (mRNA) expression changes with ischemia no reperfusion compared to sham controls (InoR/Sham).

Table S4. Mouse brain gene (mRNA) expression changes with ischemia followed by reperfusion compared to sham controls (IR/Sham).

Table S5. Transactivation of hypoxia inducible factor 1  $\alpha$  (HIF1 $\alpha$ ) target genes in InoR/Sham treated mouse brains.

Table S6. Top-ranked significantly altered pathways based on ischemia-induced gene expression changes in mouse brains (InoR/Sham).

Table S7. Top-ranked significantly altered pathways based on ischemia followed by reperfusion-induced gene expression changes in mouse brains (IR/Sham).

Table S8. Predicted brain miRNA regulatory modules associated with ischemia and reperfusion in mice.

Table S9. Predicted mRNA targets of candidate stroke miRNAs in mice.

| <b>Table S1. Primer sequences for PCR assays.</b>          |                          |                          |
|------------------------------------------------------------|--------------------------|--------------------------|
| Primers                                                    | Forward                  | Reverse                  |
| FBJ osteosarcoma oncogene (Fos) primer1                    | GGAGTGTGTTGTTC<br>CTAG   | GCACTAGATACAAT<br>CCAGCA |
| FBJ osteosarcoma oncogene (Fos) primer2                    | TGCTGGATTGTATCT<br>AGTGC | ATGAACATTGACGC<br>TGAAGG |
| Mus musculus FBJ osteosarcoma oncogene B (Fosb)            | TAATTCTGGATTTGT<br>CGGGG | TGGAGTCAATGAAT<br>TGTGGT |
| Mus musculus tumor necrosis factor (Tnf)                   | CAGCCGATTTGCTA<br>TTCAT  | AGACTCCTCCCAGG<br>TATATG |
| Mus musculus chemokine (C-C motif) receptor-like 2 (Ccr12) | ACGGTTATCTTTATC<br>TCGCC | GCCACTGTGTAGTT<br>ATCCAT |
| Mus musculus chemokine (C-C motif) ligand 3 (Ccl3)         | TGTACCATGACACT<br>CTGC   | CAACGATGAATTGG<br>CGTG   |
| Mus musculus interleukin 1 alpha (Il1a)                    | ATCAGCACCTTACA<br>CCTAC  | TAGTGTTTGTCCAC<br>ATCCTG |
| Mus musculus chemokine (C-X-C motif) ligand 1 (Cxcl1)      | TATTGTATGGTCAAC<br>ACGC  | TGTAACAGTCCTTT<br>GAACG  |
| Mus musculus Jun oncogene 24                               | AAGTGAAAACCTTG<br>AAAGCG | CCTGACAGTCTGTT<br>CTCA   |

|                                                       |                          |                          |
|-------------------------------------------------------|--------------------------|--------------------------|
| Mus musculus chemokine (C-X-C motif) ligand 2 (Cxcl2) | AGAAGTCATAGCCA<br>CTCTC  | TCTTTGGTTCTTCC<br>GTTGA  |
| Mus musculus activating transcription factor 3 (Atf3) | GCAGAAGTGTCTAC<br>CTTGAT | TGGGACAGAACAGC<br>ATATTT |
| Mus musculus beta-actin (actb)                        | GCTGTATTCCCCTC<br>CATCG  | CCAGTTGGTAACAA<br>TGCCAT |
| Mus musculus Chemerin (Rarres2)                       | GAACCATAGGACTG<br>AGGTGA | GTGGGTGTTTGTGG<br>AACT   |
|                                                       |                          |                          |

**Table S2. Distribution and dispersion analyses of brain mRNA changes associated with ischemic stroke.**

| <b>PERMANOVA</b>       |                |                  |  |  |  |  |  |  |  |  |  |  |  |  |  |  |  |  |  |  |
|------------------------|----------------|------------------|--|--|--|--|--|--|--|--|--|--|--|--|--|--|--|--|--|--|
| <b>Comparison</b>      | <b>R2</b>      | <b>Pr(&gt;F)</b> |  |  |  |  |  |  |  |  |  |  |  |  |  |  |  |  |  |  |
| InoR / Sham            | 0.24           | 1.00E-03         |  |  |  |  |  |  |  |  |  |  |  |  |  |  |  |  |  |  |
| IR / Sham              | 0.22           | 2.00E-03         |  |  |  |  |  |  |  |  |  |  |  |  |  |  |  |  |  |  |
| IR / InoR              | 0.15           | 2.10E-01         |  |  |  |  |  |  |  |  |  |  |  |  |  |  |  |  |  |  |
| <b>Betadispersions</b> |                |                  |  |  |  |  |  |  |  |  |  |  |  |  |  |  |  |  |  |  |
| <b>Comparison</b>      | <b>F-value</b> | <b>Pr(&gt;F)</b> |  |  |  |  |  |  |  |  |  |  |  |  |  |  |  |  |  |  |
| IR / Sham              | 0.48           | 5.10E-01         |  |  |  |  |  |  |  |  |  |  |  |  |  |  |  |  |  |  |
| InoR / Sham            | 1.14           | 3.16E-01         |  |  |  |  |  |  |  |  |  |  |  |  |  |  |  |  |  |  |
| IR / InoR              | 6.97           | 2.97E-02         |  |  |  |  |  |  |  |  |  |  |  |  |  |  |  |  |  |  |

**Table S3. Mouse brain gene (mRNA) expression changes with ischemia no reperfusion compared to sham controls (InoR/Sham).**

| <b>Comparison</b> | <b>Gene Symbol</b> | <b>Fold Change</b> | <b>p-value</b> | <b>Cp-value</b> | <b>Refseq</b> |
|-------------------|--------------------|--------------------|----------------|-----------------|---------------|
| InoR/Sham         | Ccl3               | 21.18              | 1.84E-09       | 2.65E-05        | NM_011337     |
| InoR/Sham         | Lcn2               | 5.83               | 1.99E-05       | 2.48E-03        | NM_008491     |
| InoR/Sham         | Atf3               | 4.55               | 1.35E-07       | 4.99E-04        | NM_007498     |
| InoR/Sham         | Zfp36              | 4.42               | 2.28E-07       | 4.99E-04        | NM_011756     |
| InoR/Sham         | Cyr61              | 4.36               | 1.47E-05       | 2.10E-03        | NM_010516     |
| InoR/Sham         | 8430408G22Rik      | 4.13               | 9.00E-06       | 1.73E-03        | NM_145980     |
| InoR/Sham         | Cdkn1a             | 3.97               | 4.51E-05       | 3.30E-03        | NM_007669     |
| InoR/Sham         | Hspa1a             | 3.88               | 1.38E-05       | 2.05E-03        | NM_010479     |
| InoR/Sham         | Cxcl2              | 3.64               | 4.63E-06       | 1.46E-03        | NM_009140     |

|           |               |      |          |          |              |
|-----------|---------------|------|----------|----------|--------------|
| InoR/Sham | Apold1        | 3.60 | 6.10E-07 | 8.37E-04 | NM_001109914 |
| InoR/Sham | Ccrl2         | 3.55 | 1.30E-06 | 1.14E-03 | NM_017466    |
| InoR/Sham | Il1a          | 3.46 | 7.42E-06 | 1.59E-03 | NM_010554    |
| InoR/Sham | Adamts1       | 3.42 | 2.86E-06 | 1.22E-03 | NM_009621    |
| InoR/Sham | Cxcl10        | 3.13 | 8.56E-04 | 1.35E-02 | NM_021274    |
| InoR/Sham | Dennd3        | 3.01 | 1.77E-07 | 4.99E-04 | NM_001081066 |
| InoR/Sham | Hao1          | 2.86 | 3.20E-05 | 2.86E-03 | NM_010403    |
| InoR/Sham | Ccl2          | 2.80 | 2.63E-05 | 2.61E-03 | NM_011333    |
| InoR/Sham | Ccl17         | 2.72 | 2.11E-03 | 2.27E-02 | NM_011332    |
| InoR/Sham | Txnip         | 2.70 | 1.21E-05 | 1.94E-03 | NM_001009935 |
| InoR/Sham | Ctla2a        | 2.66 | 6.21E-05 | 3.85E-03 | NM_007796    |
| InoR/Sham | Adamts9       | 2.64 | 2.21E-06 | 1.14E-03 | NM_175314    |
| InoR/Sham | Gadd45g       | 2.61 | 3.30E-06 | 1.29E-03 | NM_011817    |
| InoR/Sham | E030010A14Rik | 2.60 | 2.29E-05 | 2.48E-03 | NM_183160    |
| InoR/Sham | Tas2r135      | 2.59 | 3.85E-05 | 3.07E-03 | NM_199159    |
| InoR/Sham | Rnf125        | 2.57 | 2.02E-05 | 2.48E-03 | NM_026301    |
| InoR/Sham | Gm129         | 2.54 | 5.97E-05 | 3.80E-03 | NM_001033302 |
| InoR/Sham | Foxf1a        | 2.45 | 1.21E-05 | 1.94E-03 | NM_010426    |
| InoR/Sham | Gadd45b       | 2.45 | 1.19E-05 | 1.93E-03 | NM_008655    |
| InoR/Sham | Olf920        | 2.43 | 1.44E-03 | 1.82E-02 | NM_146787    |
| InoR/Sham | Map3k6        | 2.42 | 2.50E-05 | 2.55E-03 | NM_016693    |
| InoR/Sham | Trp53inp1     | 2.40 | 1.84E-05 | 2.39E-03 | NM_021897    |
| InoR/Sham | Tas2r143      | 2.40 | 6.31E-06 | 1.57E-03 | NM_001001452 |
| InoR/Sham | Gprc5a        | 2.39 | 1.13E-04 | 4.94E-03 | NM_181444    |
| InoR/Sham | Hspb1         | 2.39 | 7.26E-03 | 4.88E-02 | NM_013560    |

|           |               |      |          |          |              |
|-----------|---------------|------|----------|----------|--------------|
| InoR/Sham | Maff          | 2.30 | 2.09E-05 | 2.48E-03 | NM_010755    |
| InoR/Sham | Rrh           | 2.27 | 6.61E-06 | 1.58E-03 | NM_009102    |
| InoR/Sham | Ptgs2         | 2.21 | 1.04E-04 | 4.78E-03 | NM_011198    |
| InoR/Sham | Ppp1r15a      | 2.21 | 3.60E-05 | 3.03E-03 | NM_008654    |
| InoR/Sham | Gp49a         | 2.19 | 1.74E-03 | 2.02E-02 | NM_008147    |
| InoR/Sham | Tnf           | 2.19 | 1.15E-04 | 4.94E-03 | NM_013693    |
| InoR/Sham | Hmgb2         | 2.19 | 1.17E-05 | 1.93E-03 | NM_008252    |
| InoR/Sham | Tmcc3         | 2.17 | 3.35E-08 | 2.14E-04 | NM_172051    |
| InoR/Sham | Fosb          | 2.15 | 4.06E-06 | 1.41E-03 | NM_008036    |
| InoR/Sham | Cebpd         | 2.15 | 2.25E-05 | 2.48E-03 | NM_007679    |
| InoR/Sham | Acr           | 2.14 | 3.71E-05 | 3.05E-03 | NM_013455    |
| InoR/Sham | Ier3          | 2.12 | 1.90E-04 | 6.42E-03 | NM_133662    |
| InoR/Sham | Rel           | 2.11 | 5.87E-06 | 1.55E-03 | NM_009044    |
| InoR/Sham | Per1          | 2.10 | 1.55E-06 | 1.14E-03 | NM_001159367 |
| InoR/Sham | Edn1          | 2.10 | 3.13E-05 | 2.82E-03 | NM_010104    |
| InoR/Sham | Gjb2          | 2.09 | 1.84E-05 | 2.39E-03 | NM_008125    |
| InoR/Sham | Socs3         | 2.08 | 2.21E-05 | 2.48E-03 | NM_007707    |
| InoR/Sham | Emp1          | 2.07 | 2.04E-05 | 2.48E-03 | NM_010128    |
| InoR/Sham | Plaur         | 2.07 | 4.96E-05 | 3.47E-03 | NM_011113    |
| InoR/Sham | Csrnp1        | 2.07 | 7.38E-06 | 1.59E-03 | NM_153287    |
| InoR/Sham | Nfkbia        | 2.04 | 8.97E-05 | 4.50E-03 | NM_010907    |
| InoR/Sham | Thbs1         | 2.01 | 7.52E-04 | 1.27E-02 | NM_011580    |
| InoR/Sham | Adm           | 1.99 | 3.04E-05 | 2.79E-03 | NM_009627    |
| InoR/Sham | C130039O16Rik | 1.97 | 2.61E-05 | 2.60E-03 | NM_001163502 |
| InoR/Sham | 1700029F09Rik | 1.97 | 4.01E-03 | 3.34E-02 | NM_029368    |

|           |               |      |          |          |              |
|-----------|---------------|------|----------|----------|--------------|
| InoR/Sham | Fzd4          | 1.97 | 5.70E-05 | 3.74E-03 | NM_008055    |
| InoR/Sham | Cldn20        | 1.97 | 1.16E-04 | 4.96E-03 | NM_001101560 |
| InoR/Sham | Sox4          | 1.96 | 2.32E-04 | 6.97E-03 | NM_009238    |
| InoR/Sham | Tcp10b        | 1.96 | 2.75E-04 | 7.54E-03 | NM_011553    |
| InoR/Sham | Irak3         | 1.95 | 1.38E-05 | 2.05E-03 | NM_028679    |
| InoR/Sham | Icam1         | 1.95 | 5.89E-06 | 1.55E-03 | NM_010493    |
| InoR/Sham | Flnc          | 1.93 | 1.52E-04 | 5.73E-03 | NM_001081185 |
| InoR/Sham | Armcx5        | 1.93 | 2.50E-03 | 2.51E-02 | NM_001009575 |
| InoR/Sham | Cdh5          | 1.93 | 3.45E-04 | 8.55E-03 | NM_009868    |
| InoR/Sham | Rnf146        | 1.93 | 2.01E-03 | 2.21E-02 | NM_001110197 |
| InoR/Sham | Tnfaip3       | 1.92 | 1.53E-06 | 1.14E-03 | NM_009397    |
| InoR/Sham | Cenpa         | 1.92 | 4.32E-04 | 9.40E-03 | NM_007681    |
| InoR/Sham | Mvp           | 1.89 | 4.28E-05 | 3.23E-03 | NM_080638    |
| InoR/Sham | Ascl2         | 1.87 | 5.93E-06 | 1.55E-03 | NM_008554    |
| InoR/Sham | Plat          | 1.87 | 4.06E-05 | 3.15E-03 | NM_008872    |
| InoR/Sham | Akap12        | 1.85 | 4.43E-06 | 1.46E-03 | NM_031185    |
| InoR/Sham | Sbno2         | 1.85 | 7.21E-06 | 1.59E-03 | NM_183426    |
| InoR/Sham | C8b           | 1.82 | 7.47E-05 | 4.17E-03 | NM_133882    |
| InoR/Sham | Errfi1        | 1.81 | 1.47E-05 | 2.10E-03 | NM_133753    |
| InoR/Sham | Jun           | 1.80 | 2.41E-05 | 2.49E-03 | NM_010591    |
| InoR/Sham | 1700007K09Rik | 1.79 | 2.37E-05 | 2.49E-03 | NM_027037    |
| InoR/Sham | Gem           | 1.79 | 6.54E-05 | 3.93E-03 | NM_010276    |
| InoR/Sham | Fuz           | 1.79 | 1.39E-05 | 2.05E-03 | NM_027376    |
| InoR/Sham | Nfkbiz        | 1.78 | 4.53E-06 | 1.46E-03 | NM_030612    |
| InoR/Sham | Cd14          | 1.78 | 2.10E-04 | 6.66E-03 | NM_009841    |

|           |         |      |          |          |              |
|-----------|---------|------|----------|----------|--------------|
| InoR/Sham | Alpk3   | 1.77 | 3.09E-04 | 8.01E-03 | NM_054085    |
| InoR/Sham | Aff1    | 1.77 | 1.46E-03 | 1.83E-02 | NM_001080798 |
| InoR/Sham | Plek    | 1.76 | 7.22E-04 | 1.24E-02 | NM_019549    |
| InoR/Sham | Lrrc32  | 1.76 | 3.26E-05 | 2.87E-03 | NM_001113379 |
| InoR/Sham | Nptx2   | 1.75 | 3.57E-04 | 8.63E-03 | NM_016789    |
| InoR/Sham | Btg3    | 1.75 | 2.36E-04 | 7.03E-03 | NM_009770    |
| InoR/Sham | Fos     | 1.74 | 4.03E-04 | 9.11E-03 | NM_010234    |
| InoR/Sham | Lilrb4  | 1.74 | 5.61E-04 | 1.09E-02 | NM_013532    |
| InoR/Sham | Cc2d1b  | 1.74 | 3.94E-04 | 9.04E-03 | NM_177045    |
| InoR/Sham | Gas2l3  | 1.73 | 1.38E-05 | 2.05E-03 | NM_001033331 |
| InoR/Sham | Crct1   | 1.72 | 7.08E-04 | 1.23E-02 | NM_028798    |
| InoR/Sham | Rasd1   | 1.72 | 1.70E-03 | 1.99E-02 | NM_009026    |
| InoR/Sham | H2-gs10 | 1.71 | 2.76E-09 | 2.65E-05 | NM_001143689 |
| InoR/Sham | Iffo2   | 1.71 | 5.43E-08 | 2.60E-04 | NM_183148    |
| InoR/Sham | Angptl4 | 1.70 | 3.32E-03 | 3.00E-02 | NM_020581    |
| InoR/Sham | Cxcl1   | 1.70 | 2.70E-05 | 2.65E-03 | NM_008176    |
| InoR/Sham | Pim1    | 1.70 | 7.24E-04 | 1.24E-02 | NM_008842    |
| InoR/Sham | Cabyr   | 1.70 | 3.49E-03 | 3.08E-02 | NM_027687    |
| InoR/Sham | Rhoj    | 1.69 | 2.58E-03 | 2.55E-02 | NM_023275    |
| InoR/Sham | Birc3   | 1.69 | 6.59E-05 | 3.93E-03 | NM_007464    |
| InoR/Sham | Mafk    | 1.69 | 1.02E-05 | 1.81E-03 | NM_010757    |
| InoR/Sham | Cd86    | 1.68 | 6.04E-06 | 1.55E-03 | NM_019388    |
| InoR/Sham | Il4ra   | 1.68 | 1.82E-05 | 2.39E-03 | NM_001008700 |
| InoR/Sham | Dusp1   | 1.67 | 6.52E-05 | 3.93E-03 | NM_013642    |
| InoR/Sham | Wfikkn1 | 1.67 | 2.06E-04 | 6.61E-03 | NM_001100454 |

|           |               |      |          |          |              |
|-----------|---------------|------|----------|----------|--------------|
| InoR/Sham | Trim72        | 1.66 | 6.97E-05 | 4.06E-03 | NM_001079932 |
| InoR/Sham | Il1r2         | 1.66 | 2.76E-04 | 7.54E-03 | NM_010555    |
| InoR/Sham | Cirbp         | 1.64 | 3.67E-03 | 3.18E-02 | NM_007705    |
| InoR/Sham | H3f3b         | 1.64 | 9.26E-05 | 4.59E-03 | NM_008211    |
| InoR/Sham | Robo4         | 1.64 | 1.72E-06 | 1.14E-03 | NM_028783    |
| InoR/Sham | Zbtb16        | 1.64 | 1.30E-03 | 1.73E-02 | NM_001033324 |
| InoR/Sham | Kif23         | 1.64 | 2.33E-05 | 2.48E-03 | NM_024245    |
| InoR/Sham | Ifi30         | 1.63 | 2.20E-03 | 2.32E-02 | NM_023065    |
| InoR/Sham | Cdt1          | 1.63 | 5.29E-05 | 3.59E-03 | NM_026014    |
| InoR/Sham | Sfrp4         | 1.63 | 1.05E-03 | 1.52E-02 | NM_016687    |
| InoR/Sham | Arrdc4        | 1.63 | 7.40E-04 | 1.26E-02 | NM_001042592 |
| InoR/Sham | Blnk          | 1.63 | 2.94E-04 | 7.76E-03 | NM_008528    |
| InoR/Sham | Nedd9         | 1.62 | 1.13E-04 | 4.94E-03 | NM_001111324 |
| InoR/Sham | Nfil3         | 1.62 | 1.49E-04 | 5.67E-03 | NM_017373    |
| InoR/Sham | Nanos2        | 1.62 | 3.30E-05 | 2.88E-03 | NM_194064    |
| InoR/Sham | Spsb1         | 1.62 | 1.24E-03 | 1.68E-02 | NM_029035    |
| InoR/Sham | C030048B08Rik | 1.61 | 4.49E-03 | 3.60E-02 | NM_172991    |
| InoR/Sham | Osmr          | 1.60 | 4.13E-04 | 9.19E-03 | NM_011019    |
| InoR/Sham | Tnfrsf10b     | 1.60 | 4.76E-04 | 9.95E-03 | NM_020275    |
| InoR/Sham | Stom          | 1.60 | 1.70E-04 | 6.06E-03 | NM_013515    |
| InoR/Sham | Usp36         | 1.60 | 1.02E-04 | 4.73E-03 | NM_001033528 |
| InoR/Sham | lfrd1         | 1.60 | 1.83E-04 | 6.29E-03 | NM_013562    |
| InoR/Sham | Dcaf10        | 1.59 | 5.06E-04 | 1.03E-02 | NM_153167    |
| InoR/Sham | Stc1          | 1.59 | 3.62E-04 | 8.69E-03 | NM_009285    |
| InoR/Sham | Cry1          | 1.59 | 3.76E-05 | 3.05E-03 | NM_007771    |

|           |          |      |          |          |              |
|-----------|----------|------|----------|----------|--------------|
| InoR/Sham | Ctla2b   | 1.58 | 2.17E-03 | 2.31E-02 | NM_007797    |
| InoR/Sham | Abhd2    | 1.58 | 2.14E-05 | 2.48E-03 | NM_018811    |
| InoR/Sham | Myc      | 1.58 | 1.43E-03 | 1.81E-02 | NM_010849    |
| InoR/Sham | Taf5l    | 1.57 | 3.94E-04 | 9.04E-03 | NM_133966    |
| InoR/Sham | Ddit4    | 1.57 | 5.21E-03 | 3.96E-02 | NM_029083    |
| InoR/Sham | Fnip2    | 1.57 | 8.22E-05 | 4.37E-03 | NM_001162999 |
| InoR/Sham | Wdhd1    | 1.56 | 3.88E-05 | 3.07E-03 | NM_172598    |
| InoR/Sham | Gimap6   | 1.56 | 5.98E-04 | 1.13E-02 | NM_153175    |
| InoR/Sham | Ccn1     | 1.56 | 1.98E-05 | 2.48E-03 | NM_019937    |
| InoR/Sham | Tubb6    | 1.55 | 2.14E-03 | 2.29E-02 | NM_026473    |
| InoR/Sham | Mctp2    | 1.55 | 2.06E-04 | 6.61E-03 | NM_001024703 |
| InoR/Sham | Tle3     | 1.55 | 1.04E-03 | 1.52E-02 | NM_001083927 |
| InoR/Sham | Cxadr    | 1.55 | 1.44E-04 | 5.62E-03 | NM_009988    |
| InoR/Sham | Ankrd33b | 1.55 | 1.39E-03 | 1.78E-02 | NM_026153    |
| InoR/Sham | Sema4c   | 1.55 | 1.21E-04 | 5.03E-03 | NM_001126047 |
| InoR/Sham | Pla2g4e  | 1.54 | 5.01E-04 | 1.02E-02 | NM_177845    |
| InoR/Sham | Dis3     | 1.54 | 2.05E-04 | 6.61E-03 | NM_028315    |
| InoR/Sham | Rtl1     | 1.54 | 6.04E-03 | 4.35E-02 | NM_184109    |
| InoR/Sham | Sik1     | 1.53 | 1.53E-06 | 1.14E-03 | NM_010831    |
| InoR/Sham | Tlr7     | 1.53 | 1.06E-03 | 1.53E-02 | NM_133211    |
| InoR/Sham | Gmeb2    | 1.53 | 3.20E-05 | 2.86E-03 | NM_198169    |
| InoR/Sham | Hmgb3    | 1.53 | 1.60E-04 | 5.89E-03 | NM_008253    |
| InoR/Sham | Mfsd10   | 1.53 | 1.17E-04 | 4.98E-03 | NM_026660    |
| InoR/Sham | Slc15a3  | 1.53 | 4.57E-04 | 9.72E-03 | NM_023044    |
| InoR/Sham | Runx1    | 1.52 | 3.72E-05 | 3.05E-03 | NM_001111023 |

|           |               |       |          |          |              |
|-----------|---------------|-------|----------|----------|--------------|
| InoR/Sham | Galnt12       | 1.52  | 5.33E-05 | 3.60E-03 | NM_030166    |
| InoR/Sham | Zfp498        | 1.52  | 1.20E-04 | 5.03E-03 | NM_001081431 |
| InoR/Sham | Pgm1          | 1.52  | 2.97E-04 | 7.80E-03 | NM_025700    |
| InoR/Sham | Tinf2         | 1.52  | 2.39E-04 | 7.04E-03 | NM_145705    |
| InoR/Sham | Tlr2          | 1.52  | 6.11E-05 | 3.84E-03 | NM_011905    |
| InoR/Sham | Rsad2         | 1.51  | 3.45E-03 | 3.07E-02 | NM_021384    |
| InoR/Sham | Kcng3         | 1.51  | 4.09E-04 | 9.13E-03 | NM_153512    |
| InoR/Sham | Lox           | 1.50  | 2.87E-05 | 2.70E-03 | NM_010728    |
| InoR/Sham | Pigc          | -1.50 | 1.22E-03 | 1.66E-02 | NM_026078    |
| InoR/Sham | Zbtb26        | -1.50 | 5.46E-04 | 1.07E-02 | NM_199025    |
| InoR/Sham | Hax1          | -1.50 | 9.73E-04 | 1.45E-02 | NM_011826    |
| InoR/Sham | 1110032A04Rik | -1.50 | 1.81E-03 | 2.07E-02 | NM_001164210 |
| InoR/Sham | 2610029I01Rik | -1.50 | 1.77E-03 | 2.04E-02 | NM_029840    |
| InoR/Sham | Dscr3         | -1.50 | 5.88E-05 | 3.77E-03 | NM_007834    |
| InoR/Sham | Slc10a7       | -1.50 | 9.59E-04 | 1.44E-02 | NM_029736    |
| InoR/Sham | Cdh11         | -1.50 | 1.15E-03 | 1.60E-02 | NM_009866    |
| InoR/Sham | Golph3l       | -1.50 | 3.82E-05 | 3.07E-03 | NM_146133    |
| InoR/Sham | Elmod2        | -1.50 | 3.07E-05 | 2.79E-03 | NM_178736    |
| InoR/Sham | Hnmt          | -1.51 | 5.85E-04 | 1.11E-02 | NM_080462    |
| InoR/Sham | Lix1l         | -1.51 | 2.58E-03 | 2.55E-02 | NM_001163170 |
| InoR/Sham | 2310004I24Rik | -1.51 | 1.57E-04 | 5.84E-03 | NM_025510    |
| InoR/Sham | lft80         | -1.51 | 6.97E-04 | 1.22E-02 | NM_026641    |
| InoR/Sham | Zfp84         | -1.51 | 7.67E-04 | 1.29E-02 | NM_023750    |
| InoR/Sham | 5033414D02Rik | -1.51 | 1.83E-04 | 6.29E-03 | NM_026362    |
| InoR/Sham | Lig4          | -1.51 | 2.59E-04 | 7.35E-03 | NM_176953    |

|           |               |       |          |          |              |
|-----------|---------------|-------|----------|----------|--------------|
| InoR/Sham | Nme7          | -1.51 | 4.66E-04 | 9.83E-03 | NM_138314    |
| InoR/Sham | Sult1a1       | -1.52 | 1.10E-03 | 1.57E-02 | NM_133670    |
| InoR/Sham | Coq3          | -1.52 | 6.32E-03 | 4.47E-02 | NM_172687    |
| InoR/Sham | Zfp111        | -1.52 | 7.37E-05 | 4.15E-03 | NM_019940    |
| InoR/Sham | Zfp354b       | -1.52 | 1.75E-04 | 6.15E-03 | NM_013744    |
| InoR/Sham | I7Rn6         | -1.52 | 3.92E-04 | 9.02E-03 | NM_026304    |
| InoR/Sham | Rbm5          | -1.52 | 1.80E-04 | 6.23E-03 | NM_148930    |
| InoR/Sham | 2810408P10Rik | -1.52 | 1.65E-04 | 5.98E-03 | NM_198619    |
| InoR/Sham | Inhba         | -1.52 | 1.15E-03 | 1.60E-02 | NM_008380    |
| InoR/Sham | MacroD2       | -1.52 | 8.35E-05 | 4.37E-03 | NM_028387    |
| InoR/Sham | Vprbp         | -1.52 | 1.00E-04 | 4.71E-03 | NM_001015507 |
| InoR/Sham | Rad1          | -1.53 | 1.03E-04 | 4.75E-03 | NM_011232    |
| InoR/Sham | Prrx1         | -1.53 | 1.08E-05 | 1.85E-03 | NM_175686    |
| InoR/Sham | Oxnad1        | -1.53 | 9.13E-06 | 1.73E-03 | NM_145460    |
| InoR/Sham | Mtcp1         | -1.53 | 3.61E-04 | 8.68E-03 | NM_001039373 |
| InoR/Sham | Stradb        | -1.53 | 1.11E-04 | 4.91E-03 | NM_172656    |
| InoR/Sham | Gpr88         | -1.53 | 2.76E-03 | 2.67E-02 | NM_022427    |
| InoR/Sham | Slc19a3       | -1.53 | 1.95E-03 | 2.17E-02 | NM_030556    |
| InoR/Sham | Gtf2e2        | -1.53 | 3.25E-04 | 8.28E-03 | NM_001167922 |
| InoR/Sham | Zfp790        | -1.53 | 5.16E-04 | 1.04E-02 | NM_146185    |
| InoR/Sham | Nek1          | -1.53 | 2.07E-03 | 2.25E-02 | NM_175089    |
| InoR/Sham | Kitl          | -1.53 | 1.46E-04 | 5.64E-03 | NM_013598    |
| InoR/Sham | Zfp781        | -1.53 | 2.03E-06 | 1.14E-03 | NM_199062    |
| InoR/Sham | Bcl2          | -1.53 | 1.93E-06 | 1.14E-03 | NM_009741    |
| InoR/Sham | Acss1         | -1.53 | 3.40E-07 | 6.48E-04 | NM_080575    |

|           |               |       |          |          |              |
|-----------|---------------|-------|----------|----------|--------------|
| InoR/Sham | Papola        | -1.53 | 1.51E-04 | 5.73E-03 | NM_011112    |
| InoR/Sham | Senp7         | -1.53 | 1.11E-04 | 4.91E-03 | NM_025483    |
| InoR/Sham | Pnp2          | -1.53 | 3.25E-05 | 2.87E-03 | NM_001123371 |
| InoR/Sham | Uprt          | -1.53 | 2.78E-04 | 7.54E-03 | NM_001081189 |
| InoR/Sham | Sgce          | -1.54 | 3.88E-04 | 8.97E-03 | NM_001130190 |
| InoR/Sham | Fn3krp        | -1.54 | 4.35E-04 | 9.43E-03 | NM_181420    |
| InoR/Sham | 1110057K04Rik | -1.54 | 2.54E-04 | 7.31E-03 | NM_172401    |
| InoR/Sham | Cspp1         | -1.54 | 6.63E-03 | 4.61E-02 | NM_026493    |
| InoR/Sham | Tmem107       | -1.54 | 5.64E-04 | 1.09E-02 | NM_028336    |
| InoR/Sham | Ankrd27       | -1.54 | 8.05E-04 | 1.31E-02 | NM_145633    |
| InoR/Sham | Hibch         | -1.54 | 2.45E-04 | 7.15E-03 | NM_146108    |
| InoR/Sham | Ly6c2         | -1.54 | 2.29E-04 | 6.94E-03 | NM_001099217 |
| InoR/Sham | Cdk4          | -1.54 | 2.37E-05 | 2.49E-03 | NM_009870    |
| InoR/Sham | Il10rb        | -1.54 | 2.94E-04 | 7.76E-03 | NM_008349    |
| InoR/Sham | Zfp229        | -1.54 | 4.18E-03 | 3.43E-02 | NM_001164676 |
| InoR/Sham | Tmem173       | -1.54 | 6.09E-05 | 3.84E-03 | NM_028261    |
| InoR/Sham | Cdh10         | -1.55 | 3.37E-04 | 8.41E-03 | NM_009865    |
| InoR/Sham | Mrpl51        | -1.55 | 4.92E-05 | 3.46E-03 | NM_025595    |
| InoR/Sham | Zfp426        | -1.55 | 4.57E-05 | 3.33E-03 | NM_146221    |
| InoR/Sham | A430107O13Rik | -1.55 | 1.96E-06 | 1.14E-03 | NM_001081351 |
| InoR/Sham | Pcdh18        | -1.55 | 5.60E-06 | 1.55E-03 | NM_130448    |
| InoR/Sham | Ahsa2         | -1.55 | 1.34E-04 | 5.32E-03 | NM_172391    |
| InoR/Sham | Ptchd1        | -1.55 | 2.69E-04 | 7.48E-03 | NM_001093750 |
| InoR/Sham | Folh1         | -1.55 | 1.32E-04 | 5.27E-03 | NM_016770    |
| InoR/Sham | Ugt8a         | -1.55 | 4.32E-04 | 9.40E-03 | NM_011674    |

|           |               |       |          |          |              |
|-----------|---------------|-------|----------|----------|--------------|
| InoR/Sham | Insig2        | -1.55 | 2.97E-04 | 7.80E-03 | NM_133748    |
| InoR/Sham | Prelp         | -1.55 | 1.09E-04 | 4.90E-03 | NM_054077    |
| InoR/Sham | Uba6          | -1.56 | 1.73E-04 | 6.11E-03 | NM_172712    |
| InoR/Sham | Zfp583        | -1.56 | 2.36E-04 | 7.03E-03 | NM_001033249 |
| InoR/Sham | Fv1           | -1.56 | 2.92E-05 | 2.73E-03 | NM_010244    |
| InoR/Sham | Htr1b         | -1.56 | 4.34E-05 | 3.23E-03 | NM_010482    |
| InoR/Sham | Tmem22        | -1.56 | 1.65E-03 | 1.96E-02 | NM_001101483 |
| InoR/Sham | Dnajc28       | -1.56 | 2.45E-06 | 1.20E-03 | NM_001099738 |
| InoR/Sham | Zfp709        | -1.56 | 5.58E-03 | 4.14E-02 | NM_145624    |
| InoR/Sham | Amn1          | -1.56 | 4.57E-04 | 9.72E-03 | NM_001113424 |
| InoR/Sham | Zfp563        | -1.56 | 2.79E-03 | 2.68E-02 | NM_001024950 |
| InoR/Sham | Fam161b       | -1.57 | 2.02E-04 | 6.55E-03 | NM_172581    |
| InoR/Sham | Ccdc28a       | -1.57 | 6.80E-04 | 1.21E-02 | NM_144820    |
| InoR/Sham | Ncbp2         | -1.57 | 4.65E-03 | 3.69E-02 | NM_026554    |
| InoR/Sham | Eri2          | -1.57 | 1.10E-03 | 1.57E-02 | NM_027698    |
| InoR/Sham | Zfp882        | -1.57 | 2.49E-03 | 2.51E-02 | NM_001166645 |
| InoR/Sham | Polk          | -1.57 | 7.38E-04 | 1.26E-02 | NM_012048    |
| InoR/Sham | 6720457D02Rik | -1.57 | 1.26E-03 | 1.70E-02 | NM_175252    |
| InoR/Sham | Ddit4l        | -1.57 | 3.56E-04 | 8.63E-03 | NM_030143    |
| InoR/Sham | Pigh          | -1.57 | 1.00E-04 | 4.71E-03 | NM_029988    |
| InoR/Sham | Tmem119       | -1.58 | 6.12E-05 | 3.84E-03 | NM_146162    |
| InoR/Sham | Zfp809        | -1.58 | 2.57E-05 | 2.60E-03 | NM_172763    |
| InoR/Sham | Cog6          | -1.58 | 9.98E-06 | 1.81E-03 | NM_026225    |
| InoR/Sham | Slitrk6       | -1.58 | 1.70E-03 | 1.99E-02 | NM_175499    |
| InoR/Sham | Pot1b         | -1.58 | 5.69E-04 | 1.09E-02 | NM_028370    |

|           |               |       |          |          |              |
|-----------|---------------|-------|----------|----------|--------------|
| InoR/Sham | Zfp846        | -1.58 | 1.63E-04 | 5.98E-03 | NM_172919    |
| InoR/Sham | 0610007P08Rik | -1.59 | 1.53E-03 | 1.88E-02 | NM_001013608 |
| InoR/Sham | Gm10035       | -1.59 | 6.89E-06 | 1.59E-03 | NM_001081471 |
| InoR/Sham | Zfp329        | -1.59 | 1.09E-04 | 4.90E-03 | NM_026046    |
| InoR/Sham | Gm4787        | -1.59 | 1.47E-03 | 1.83E-02 | NM_001038995 |
| InoR/Sham | BC049349      | -1.59 | 2.72E-03 | 2.65E-02 | NM_001164581 |
| InoR/Sham | Stxbp4        | -1.59 | 3.69E-04 | 8.76E-03 | NM_011505    |
| InoR/Sham | Hcrtr2        | -1.59 | 4.62E-04 | 9.78E-03 | NM_198962    |
| InoR/Sham | 0610009B22Rik | -1.59 | 2.97E-05 | 2.76E-03 | NM_025319    |
| InoR/Sham | Slc38a5       | -1.59 | 2.09E-04 | 6.64E-03 | NM_172479    |
| InoR/Sham | Zfp51         | -1.60 | 1.30E-04 | 5.23E-03 | NM_009558    |
| InoR/Sham | Tax1bp3       | -1.60 | 6.11E-07 | 8.37E-04 | NM_029564    |
| InoR/Sham | Nudt5         | -1.60 | 1.36E-04 | 5.35E-03 | NM_016918    |
| InoR/Sham | N6amt2        | -1.60 | 7.17E-04 | 1.24E-02 | NM_026526    |
| InoR/Sham | C330019L16Rik | -1.61 | 2.53E-03 | 2.52E-02 | NM_001034857 |
| InoR/Sham | Rasgrp3       | -1.61 | 7.74E-04 | 1.29E-02 | NM_207246    |
| InoR/Sham | Fmo1          | -1.61 | 1.52E-05 | 2.16E-03 | NM_010231    |
| InoR/Sham | Opn3          | -1.61 | 3.97E-05 | 3.12E-03 | NM_010098    |
| InoR/Sham | Mis12         | -1.61 | 4.61E-05 | 3.33E-03 | NM_025993    |
| InoR/Sham | Tubd1         | -1.61 | 7.06E-05 | 4.07E-03 | NM_019756    |
| InoR/Sham | Fam18b        | -1.61 | 1.97E-03 | 2.18E-02 | NM_026210    |
| InoR/Sham | Slc7a11       | -1.61 | 1.56E-03 | 1.90E-02 | NM_011990    |
| InoR/Sham | Tek           | -1.62 | 2.48E-03 | 2.50E-02 | NM_013690    |
| InoR/Sham | Zfp873        | -1.62 | 5.40E-04 | 1.06E-02 | NM_001024626 |
| InoR/Sham | Ppil6         | -1.62 | 2.29E-04 | 6.94E-03 | NM_028430    |

|           |               |       |          |          |              |
|-----------|---------------|-------|----------|----------|--------------|
| InoR/Sham | Rbbp9         | -1.62 | 6.38E-05 | 3.92E-03 | NM_015754    |
| InoR/Sham | Akr1e1        | -1.62 | 8.34E-05 | 4.37E-03 | NM_018859    |
| InoR/Sham | Serpib9       | -1.62 | 2.90E-04 | 7.71E-03 | NM_009256    |
| InoR/Sham | Kbtbd8        | -1.62 | 6.15E-06 | 1.55E-03 | NM_001008785 |
| InoR/Sham | 4930430F08Rik | -1.62 | 3.53E-04 | 8.63E-03 | NM_175128    |
| InoR/Sham | Ubxn2b        | -1.63 | 4.32E-04 | 9.40E-03 | NM_026534    |
| InoR/Sham | Serpib8       | -1.63 | 9.45E-05 | 4.59E-03 | NM_011459    |
| InoR/Sham | Slitrk2       | -1.63 | 1.74E-04 | 6.15E-03 | NM_001161431 |
| InoR/Sham | Lipa          | -1.63 | 2.49E-06 | 1.20E-03 | NM_021460    |
| InoR/Sham | Dus4l         | -1.63 | 2.20E-04 | 6.79E-03 | NM_028002    |
| InoR/Sham | Calcl         | -1.63 | 3.61E-04 | 8.68E-03 | NM_018782    |
| InoR/Sham | Serpib6b      | -1.63 | 2.97E-05 | 2.76E-03 | NM_011454    |
| InoR/Sham | Ly6c1         | -1.63 | 2.65E-04 | 7.45E-03 | NM_010741    |
| InoR/Sham | Slc38a9       | -1.64 | 7.23E-05 | 4.12E-03 | NM_178746    |
| InoR/Sham | Ttc21b        | -1.64 | 4.05E-04 | 9.11E-03 | NM_001047604 |
| InoR/Sham | Zfp160        | -1.64 | 1.58E-03 | 1.92E-02 | NM_145483    |
| InoR/Sham | Zfp420        | -1.64 | 8.43E-05 | 4.37E-03 | NM_172740    |
| InoR/Sham | Rpgrip1l      | -1.65 | 8.30E-05 | 4.37E-03 | NM_173431    |
| InoR/Sham | Trib2         | -1.65 | 1.15E-05 | 1.91E-03 | NM_144551    |
| InoR/Sham | Zswim3        | -1.65 | 7.06E-06 | 1.59E-03 | NM_178375    |
| InoR/Sham | Zfp87         | -1.65 | 2.99E-04 | 7.83E-03 | NM_133228    |
| InoR/Sham | Anxa3         | -1.65 | 1.06E-04 | 4.84E-03 | NM_013470    |
| InoR/Sham | Mitd1         | -1.65 | 8.46E-04 | 1.35E-02 | NM_026913    |
| InoR/Sham | 1700034H14Rik | -1.66 | 7.09E-04 | 1.23E-02 | NM_025969    |
| InoR/Sham | Ankrd26       | -1.66 | 2.05E-04 | 6.61E-03 | NM_001081112 |

|           |               |       |          |          |              |
|-----------|---------------|-------|----------|----------|--------------|
| InoR/Sham | Tmem177       | -1.66 | 1.33E-04 | 5.30E-03 | NM_175106    |
| InoR/Sham | Srek1ip1      | -1.66 | 4.41E-05 | 3.25E-03 | NM_026075    |
| InoR/Sham | Wdr92         | -1.66 | 3.88E-04 | 8.97E-03 | NM_178909    |
| InoR/Sham | Fa2h          | -1.66 | 4.11E-05 | 3.17E-03 | NM_178086    |
| InoR/Sham | Mettl4        | -1.67 | 1.76E-04 | 6.16E-03 | NM_176917    |
| InoR/Sham | Zfp874b       | -1.67 | 1.24E-04 | 5.10E-03 | NM_001076791 |
| InoR/Sham | Clec2d        | -1.67 | 4.06E-04 | 9.11E-03 | NM_053109    |
| InoR/Sham | 2310001H12Rik | -1.67 | 1.13E-04 | 4.94E-03 | NM_001024731 |
| InoR/Sham | Erbp3         | -1.68 | 4.04E-05 | 3.15E-03 | NM_010153    |
| InoR/Sham | Armc2         | -1.68 | 7.17E-03 | 4.86E-02 | NM_001034858 |
| InoR/Sham | Rpp38         | -1.68 | 3.55E-04 | 8.63E-03 | NM_001013376 |
| InoR/Sham | Ndp           | -1.68 | 1.21E-04 | 5.03E-03 | NM_010883    |
| InoR/Sham | 5830433M19Rik | -1.70 | 1.16E-04 | 4.95E-03 | NM_026368    |
| InoR/Sham | Abca9         | -1.70 | 5.62E-05 | 3.72E-03 | NM_147220    |
| InoR/Sham | Mettl3        | -1.70 | 1.13E-03 | 1.59E-02 | NM_019721    |
| InoR/Sham | Nmbr          | -1.71 | 3.56E-03 | 3.11E-02 | NM_008703    |
| InoR/Sham | Otub2         | -1.71 | 1.67E-04 | 6.01E-03 | NM_001177841 |
| InoR/Sham | Kbtbd3        | -1.71 | 9.32E-05 | 4.59E-03 | NM_026962    |
| InoR/Sham | D14Abb1e      | -1.71 | 2.79E-04 | 7.54E-03 | NM_001114879 |
| InoR/Sham | Ints6         | -1.71 | 2.59E-04 | 7.35E-03 | NM_008715    |
| InoR/Sham | Slco1c1       | -1.72 | 6.42E-05 | 3.92E-03 | NM_021471    |
| InoR/Sham | Gpr52         | -1.73 | 2.12E-04 | 6.68E-03 | NM_001146330 |
| InoR/Sham | Slc39a2       | -1.73 | 2.29E-05 | 2.48E-03 | NM_001039676 |
| InoR/Sham | Homer2        | -1.73 | 2.23E-03 | 2.34E-02 | NM_011983    |
| InoR/Sham | Tm6sf2        | -1.73 | 2.39E-04 | 7.04E-03 | NM_181540    |

|           |               |       |          |          |              |
|-----------|---------------|-------|----------|----------|--------------|
| InoR/Sham | Zfp58         | -1.74 | 2.69E-04 | 7.48E-03 | NM_001007575 |
| InoR/Sham | Dcun1d2       | -1.74 | 3.16E-04 | 8.11E-03 | NM_001024504 |
| InoR/Sham | 4933433P14Rik | -1.75 | 2.32E-05 | 2.48E-03 | NM_178613    |
| InoR/Sham | Chordc1       | -1.75 | 2.80E-04 | 7.54E-03 | NM_025844    |
| InoR/Sham | Anpep         | -1.76 | 6.70E-06 | 1.59E-03 | NM_008486    |
| InoR/Sham | Usp31         | -1.76 | 1.89E-03 | 2.12E-02 | NM_001033173 |
| InoR/Sham | Gpr6          | -1.77 | 1.01E-04 | 4.71E-03 | NM_199058    |
| InoR/Sham | Ranbp3l       | -1.77 | 4.62E-06 | 1.46E-03 | NM_198024    |
| InoR/Sham | Zfp40         | -1.77 | 4.78E-03 | 3.74E-02 | NM_009555    |
| InoR/Sham | Pot1a         | -1.78 | 1.07E-03 | 1.54E-02 | NM_133931    |
| InoR/Sham | Rxrg          | -1.78 | 5.97E-04 | 1.13E-02 | NM_009107    |
| InoR/Sham | Cml5          | -1.79 | 6.59E-05 | 3.93E-03 | NM_023493    |
| InoR/Sham | Zfp71-rs1     | -1.80 | 8.65E-05 | 4.40E-03 | NM_145622    |
| InoR/Sham | Vmn2r86       | -1.80 | 3.71E-04 | 8.76E-03 | NM_001103365 |
| InoR/Sham | Cx3cr1        | -1.80 | 2.70E-06 | 1.20E-03 | NM_009987    |
| InoR/Sham | Zfp60         | -1.80 | 1.30E-04 | 5.22E-03 | NM_009560    |
| InoR/Sham | Zfp113        | -1.81 | 2.14E-06 | 1.14E-03 | NM_019747    |
| InoR/Sham | Dguok         | -1.82 | 1.21E-04 | 5.03E-03 | NM_013764    |
| InoR/Sham | 2810021G02Rik | -1.84 | 8.54E-04 | 1.35E-02 | NM_001162922 |
| InoR/Sham | Rsl1          | -1.85 | 2.24E-05 | 2.48E-03 | NM_001013769 |
| InoR/Sham | Gm4979        | -1.86 | 1.06E-05 | 1.83E-03 | NM_001142411 |
| InoR/Sham | Zfp760        | -1.87 | 3.51E-06 | 1.34E-03 | NM_001008501 |
| InoR/Sham | Zfp595        | -1.88 | 6.15E-05 | 3.84E-03 | NM_177622    |
| InoR/Sham | Obfc2a        | -1.88 | 1.77E-03 | 2.04E-02 | NM_028696    |
| InoR/Sham | Lekr1         | -1.88 | 3.43E-04 | 8.54E-03 | NM_001037923 |

|           |               |       |          |          |              |
|-----------|---------------|-------|----------|----------|--------------|
| InoR/Sham | P2ry13        | -1.89 | 2.82E-05 | 2.69E-03 | NM_028808    |
| InoR/Sham | E2f6          | -1.89 | 1.32E-05 | 2.03E-03 | NM_033270    |
| InoR/Sham | Bet1          | -1.90 | 5.03E-04 | 1.02E-02 | NM_009748    |
| InoR/Sham | Zfp418        | -1.94 | 8.65E-07 | 1.10E-03 | NM_146179    |
| InoR/Sham | BC018101      | -1.95 | 5.67E-06 | 1.55E-03 | NM_001005358 |
| InoR/Sham | Zfp825        | -1.96 | 9.86E-04 | 1.47E-02 | NM_146231    |
| InoR/Sham | Pou3f4        | -1.96 | 1.02E-06 | 1.10E-03 | NM_008901    |
| InoR/Sham | Ly6a          | -1.97 | 6.87E-05 | 4.06E-03 | NM_010738    |
| InoR/Sham | Mettl7a1      | -1.97 | 6.13E-05 | 3.84E-03 | NM_027334    |
| InoR/Sham | Zfp455        | -1.97 | 1.31E-05 | 2.03E-03 | NM_001048204 |
| InoR/Sham | 3110052M02Rik | -1.99 | 6.43E-04 | 1.17E-02 | NM_001166497 |
| InoR/Sham | Mkks          | -1.99 | 6.48E-05 | 3.93E-03 | NM_021527    |
| InoR/Sham | Gnpda2        | -2.00 | 3.96E-06 | 1.41E-03 | NM_001038015 |
| InoR/Sham | Dapl1         | -2.00 | 5.19E-04 | 1.04E-02 | NM_029723    |
| InoR/Sham | Chac2         | -2.03 | 9.98E-04 | 1.48E-02 | NM_026527    |
| InoR/Sham | 1190005F20Rik | -2.03 | 2.16E-05 | 2.48E-03 | NM_026876    |
| InoR/Sham | Tfb1m         | -2.05 | 7.24E-05 | 4.12E-03 | NM_146074    |
| InoR/Sham | Egr2          | -2.06 | 3.44E-04 | 8.54E-03 | NM_010118    |
| InoR/Sham | Slco1a4       | -2.10 | 6.87E-04 | 1.22E-02 | NM_030687    |
| InoR/Sham | Hpgd          | -2.11 | 2.69E-04 | 7.48E-03 | NM_008278    |
| InoR/Sham | Senp8         | -2.13 | 8.41E-05 | 4.37E-03 | NM_001172068 |
| InoR/Sham | Spry3         | -2.17 | 4.15E-05 | 3.19E-03 | NM_001030293 |
| InoR/Sham | Nfe2l2        | -2.17 | 2.66E-06 | 1.20E-03 | NM_010902    |
| InoR/Sham | Zfp719        | -2.21 | 2.33E-05 | 2.48E-03 | NM_172482    |
| InoR/Sham | Zfp759        | -2.23 | 1.49E-04 | 5.67E-03 | NM_172392    |

|           |          |       |          |          |              |
|-----------|----------|-------|----------|----------|--------------|
| InoR/Sham | Mrpl36   | -2.24 | 2.03E-05 | 2.48E-03 | NM_053163    |
| InoR/Sham | Tmem126b | -2.27 | 2.26E-04 | 6.86E-03 | NM_026734    |
| InoR/Sham | Ptpn2    | -2.27 | 4.68E-05 | 3.37E-03 | NM_001127177 |
| InoR/Sham | Kctd21   | -2.27 | 3.69E-05 | 3.05E-03 | NM_001039039 |
| InoR/Sham | Arc      | -2.41 | 2.25E-05 | 2.48E-03 | NM_018790    |
| InoR/Sham | Zfp72    | -2.50 | 1.44E-04 | 5.61E-03 | NM_001081680 |
| InoR/Sham | Gpr17    | -2.56 | 3.58E-06 | 1.35E-03 | NM_001025381 |
| InoR/Sham | Thap2    | -2.60 | 3.76E-05 | 3.05E-03 | NM_025780    |

**Table S5. Transactivation of hypoxia inducible factor 1  $\alpha$  (HIF1 $\alpha$ ) target genes in InoR/Sham treated mouse brains.**

| InoR/Sham Genes | Target         | Function                |
|-----------------|----------------|-------------------------|
| Adamts1         | ADAM-TS1       | Metalloprotease         |
| Adm             | Adrenomedullin | Receptor ligand         |
| Akap12          | AKAP12         | Generic binding protein |
| Angptl4         | PGAR           | Generic binding protein |
| Ascl2           | ASH2           | Transcription factor    |
| Atf3            | ATF-3          | Transcription factor    |
| Birc3           | c-IAP2         | Generic binding protein |
| Ccl2            | CCL2           | Receptor ligand         |
| Cdh5            | VE-cadherin    | Generic binding protein |
| Cdkn1a          | p21            | Generic binding protein |
| Cxcl2           | GRO-3          | Receptor ligand         |
| Cxcl1           | GRO-2          | Receptor ligand         |
| Cyr61           | Cyr61          | Receptor ligand         |
| Ddit4           | REDD1          | Protein                 |
| Edn1            | Endothelin-1   | Receptor ligand         |
| Errfi1          | MIG6           | Generic binding protein |
| Gadd45b         | GADD45 beta    | Generic binding protein |
| Icam1           | ICAM1          | Generic receptor        |

|       |                       |                         |
|-------|-----------------------|-------------------------|
| Jun   | c-Jun                 | Transcription factor    |
| Lox   | Lysyl oxidase         | Generic enzyme          |
| Nedd9 | CAS-L                 | Generic binding protein |
| Pim1  | LONP                  | Generic protease        |
| Plaur | PLAUR (uPAR)          | Generic receptor        |
| Ptgs2 | COX-2 (PTGS2)         | Generic enzyme          |
| Rel   | c-Rel (NF-kB subunit) | Transcription factor    |
| Socs3 | SOCS3                 | Generic binding protein |
| Stc1  | Stanniocalcin 1       | Generic binding protein |
| Thbs1 | Thrombospondin 1      | Receptor ligand         |
| Tlr2  | TLR2                  | Generic receptor        |
| Tnf   | TNF-alpha             | Receptor ligand         |

| <b>Table S6. Top-ranked significantly altered pathways based on ischemia-induced gene expression changes in mouse brains (InoR/Sham).</b> |                                                      |                     |                         |                 |                 |                                                                                                          |
|-------------------------------------------------------------------------------------------------------------------------------------------|------------------------------------------------------|---------------------|-------------------------|-----------------|-----------------|----------------------------------------------------------------------------------------------------------|
| <b>#</b>                                                                                                                                  | <b>Maps</b>                                          | <b>Active Genes</b> | <b>Total in Pathway</b> | <b>p-value</b>  | <b>FDR</b>      | <b>Network Objects from Active Data</b>                                                                  |
| 1                                                                                                                                         | IL-1 signaling in melanoma                           | 11                  | 42                      | 9.4776<br>1E-12 | 9.32597<br>E-09 | p21, GRO-3, AP-1, COX-2 (PTGS2), IL-1 alpha, ICAM1, GRO-2, CCL2, I-kB, c-Jun, c-Jun/c-Fos                |
| 2                                                                                                                                         | Inflammatory mechanisms of pancreatic cancerogenesis | 12                  | 67                      | 1.3083<br>E-10  | 6.43682<br>E-08 | AP-1, COX-2 (PTGS2), IL-1 alpha, ICAM1, C/EBP, CCL2, NFKBIA, Bcl-2, c-Jun, c-Jun/c-Fos, c-Fos, TNF-alpha |
| 3                                                                                                                                         | The innate immune response to contact allergens      | 9                   | 33                      | 5.2406<br>E-10  | 1.71892<br>E-07 | AP-1, IL-1 alpha, TXNIP (VDUP1), CCL2, HSP70, TLR2, NRF2, CD14, TNF-alpha                                |
| 4                                                                                                                                         | Immune response_IL-10 signaling pathway              | 11                  | 62                      | 8.8219<br>2E-10 | 2.07797<br>E-07 | COX-2 (PTGS2), IL-1 alpha, ICAM1, CD86, IL10RB, IKBZ,                                                    |

|    |                                                                                          |    |     |                 |                 |                                                                                                                         |
|----|------------------------------------------------------------------------------------------|----|-----|-----------------|-----------------|-------------------------------------------------------------------------------------------------------------------------|
|    |                                                                                          |    |     |                 |                 | SOCS3, Bcl-2, CD14, HPGD, TNF-alpha                                                                                     |
| 5  | Immune response_IL-18 signaling                                                          | 11 | 63  | 1.0558<br>8E-09 | 2.07797<br>E-07 | AP-1, COX-2 (PTGS2), IL-1 alpha, ICAM1, CCL2, I-kB, Bcl-2, c-Jun, c-Jun/c-Fos, c-Fos, TNF-alpha                         |
| 6  | TNF-alpha-induced inflammatory signaling in normal and asthmatic airway epithelium       | 9  | 38  | 2.0850<br>6E-09 | 3.41949<br>E-07 | ICAM1, CCL2, NFKBIA, CCL17, I-kB, c-Jun, IP10, c-Fos, TNF-alpha                                                         |
| 7  | Immune response_HSP60 and HSP70/ TLR signaling pathway                                   | 10 | 54  | 3.4075<br>2E-09 | 4.78999<br>E-07 | AP-1, ICAM1, HSP70, CD86, I-kB, TLR2, c-Jun, CD14, c-Jun/c-Fos, TNF-alpha                                               |
| 8  | Immune response_IL-6 signaling pathway via JAK/STAT                                      | 11 | 72  | 4.6446<br>E-09  | 5.41036<br>E-07 | p21, AP-1, COX-2 (PTGS2), CDK4, ICAM1, CCL2, SOCS3, c-Jun, c-Jun/c-Fos, c-Fos, C/EBPdelta                               |
| 9  | Immune response_IL-5 signaling via JAK/STAT                                              | 10 | 56  | 4.9485<br>E-09  | 5.41036<br>E-07 | SOX4, Pim-1, NFKBIA, E4BP4, Bcl-2, c-Jun, MKP-1, c-IAP2, c-Myc, c-Fos                                                   |
| 10 | Immune response_Substance P-stimulated expression of proinflammatory cytokines via MAPKs | 9  | 43  | 6.7898<br>5E-09 | 6.68121<br>E-07 | GRO-3, CCL3L1, COX-2 (PTGS2), GRO-2, CCL2, I-kB, c-Jun, CCL13, TNF-alpha                                                |
| 11 | Macrophage and dendritic cell phenotype shift in cancer                                  | 12 | 100 | 1.5328<br>7E-08 | 1.37122<br>E-06 | COX-2 (PTGS2), Activin A, c-Rel (NF-kB subunit), TLR7, CD86, Thrombospondin 1, SOCS3, I-kB, ILT3, TLR2, IP10, TNF-alpha |
| 12 | Immune response_IL-1 signaling pathway                                                   | 11 | 82  | 1.9053<br>5E-08 | 1.52809<br>E-06 | HSP27, AP-1, COX-2 (PTGS2), IL-1 alpha, ZFP36(Tristetraprolin), ICAM1, CCL2, I-kB, c-IAP2, IP10, TNF-alpha              |
| 13 | Immune response_MIF-mediated glucocorticoid regulation                                   | 7  | 23  | 2.0188<br>1E-08 | 1.52809<br>E-06 | COX-2 (PTGS2), ICAM1, NFKBIA, I-kB, c-Jun, c-Fos, TNF-alpha                                                             |
| 14 | Interleukins-induced inflammatory response in asthmatic airway fibroblasts               | 8  | 35  | 2.2960<br>4E-08 | 1.61379<br>E-06 | COX-2 (PTGS2), IL-1 alpha, ICAM1, GRO-2,                                                                                |

|    |                                                                                                                                               |   |    |             |             |                                                                                  |
|----|-----------------------------------------------------------------------------------------------------------------------------------------------|---|----|-------------|-------------|----------------------------------------------------------------------------------|
|    |                                                                                                                                               |   |    |             |             | MGF, CCL2, c-Jun, c-Fos                                                          |
| 15 | Immune response_IL-22 signaling pathway                                                                                                       | 8 | 36 | 2.91681E-08 | 1.91343E-06 | CD86, IL10RB, SOCS3, Bcl-2, c-Jun, c-Jun/c-Fos, c-Myc, c-Fos                     |
| 16 | Cooperative action of IFN-gamma and TNF-alpha on astrocytes in multiple sclerosis                                                             | 8 | 37 | 3.67702E-08 | 2.26136E-06 | ICAM1, CCL2, CD86, NFKBIA, I-kB, IP10, TNF-alpha, C/EBPdelta                     |
| 17 | Immune response_CCL2 signaling                                                                                                                | 9 | 54 | 5.60585E-08 | 3.2448E-06  | AP-1, IL-1 alpha, ICAM1, CCL2, VE-cadherin, c-Jun, c-Jun/c-Fos, c-Fos, TNF-alpha |
| 18 | Role of IFN-beta in the improvement of blood-brain barrier integrity in multiple sclerosis                                                    | 7 | 27 | 6.97281E-08 | 3.81181E-06 | AP-1, ICAM1, c-Jun, c-Jun/c-Fos, c-Fos, TNF-alpha, sICAM1                        |
| 19 | Immune response_IL-17 signaling pathways                                                                                                      | 9 | 60 | 1.44938E-07 | 7.50629E-06 | COX-2 (PTGS2), ICAM1, CCL2, I-kB, c-Jun, c-Jun/c-Fos, NGAL, c-Fos, C/EBPdelta    |
| 20 | Role of TLR signaling in skin sensitization                                                                                                   | 8 | 44 | 1.55189E-07 | 7.63529E-06 | HSP27, AP-1, HSP70, CD86, I-kB, TLR2, CD14, TNF-alpha                            |
| 21 | Immune response_TNF-R2 signaling pathways                                                                                                     | 8 | 45 | 1.86491E-07 | 8.73845E-06 | AP-1, I-kB, Bcl-2, c-Jun, c-IAP1, c-IAP2, c-Jun/c-Fos, TNF-alpha                 |
| 22 | Immune response_IL-4-induced regulators of cell growth, survival, differentiation and metabolism                                              | 9 | 63 | 2.23788E-07 | 1.00094E-05 | p21, AP-1, CDK4, PGAR, SOCS3, Bcl-2, EGR2 (Krox20), IL4RA, c-Myc                 |
| 23 | TNF-alpha and IL-1 beta-mediated regulation of contraction and secretion of inflammatory factors in normal and asthmatic airway smooth muscle | 9 | 65 | 2.95046E-07 | 1.26228E-05 | GRO-3, COX-2 (PTGS2), GRO-2, CCL2, NFKBIA, c-Jun, Histone H3, c-Fos, TNF-alpha   |
| 24 | Chemokines in inflammation in adipose tissue and liver in obesity, type 2 diabetes and metabolic syndrome X                                   | 8 | 48 | 3.14929E-07 | 1.29121E-05 | ICAM1, CX3CR1, CCL2, CD86, PLAUR (uPAR), TLR2, CD14, TNF-alpha                   |
| 25 | Th2 cytokine- and TNF-alpha-induced inflammatory response in asthmatic airway fibroblasts                                                     | 7 | 35 | 4.80098E-07 | 1.88967E-05 | COX-2 (PTGS2), ICAM1, CCL2, c-Jun, IL4RA, c-Fos, TNF-alpha                       |

|    |                                                                                                                                 |    |     |             |             |                                                                                                             |
|----|---------------------------------------------------------------------------------------------------------------------------------|----|-----|-------------|-------------|-------------------------------------------------------------------------------------------------------------|
| 26 | Immune response_HMGB1/RAGE signaling pathway                                                                                    | 8  | 53  | 6.96645E-07 | 2.63653E-05 | IL-1 alpha, ICAM1, NFKBIA, PLAT (TPA), I-kB, TLR2, c-Jun, TNF-alpha                                         |
| 27 | Transcription_HIF-1 targets                                                                                                     | 10 | 95  | 8.74978E-07 | 3.18881E-05 | p21, Endothelin-1, CX3CR1, Adrenomedullin, MGF, REDD1, Thrombospondin 1, PLAUR (uPAR), Lysyl oxidase, c-Myc |
| 28 | EGFR family signaling in pancreatic cancer                                                                                      | 9  | 75  | 1.0274E-06  | 3.61057E-05 | p21, COX-2 (PTGS2), CDK4, I-kB, Bcl-2, c-Jun, c-Myc, c-Fos, ErbB3                                           |
| 29 | IL-1 beta- and Endothelin-1-induced fibroblast/myofibroblast migration and extracellular matrix production in asthmatic airways | 7  | 40  | 1.25429E-06 | 4.25595E-05 | AP-1, IL-1 alpha, Endothelin-1, CCL2, Thrombospondin 1, c-Jun, c-Jun/c-Fos                                  |
| 30 | Glucocorticoid- and LABA-mediated inhibition of pro-inflammatory signaling in airway fibroblasts/myofibroblasts                 | 6  | 28  | 2.12729E-06 | 6.9775E-05  | AP-1, IL-1 alpha, ICAM1, c-Jun, c-Jun/c-Fos, TNF-alpha                                                      |
| 31 | Cigarette smoke-mediated attenuation of antibacterial and antiviral immune response                                             | 6  | 29  | 2.65101E-06 | 8.41483E-05 | AP-1, ICAM1, NFKBIA, IP10, TNF-alpha, sICAM1                                                                |
| 32 | Oxidative stress_ROS-induced cellular signaling                                                                                 | 10 | 108 | 2.86424E-06 | 8.80755E-05 | p21, HSP27, COX-2 (PTGS2), TXNIP (VDUP1), Adrenomedullin, NFKBIA, HSPA1A, NRF2, c-Jun/c-Fos, TNF-alpha      |
| 33 | Immune response_Histamine H1 receptor signaling in immune response                                                              | 7  | 47  | 3.89379E-06 | 0.000116106 | ICAM1, NFKBIA, I-kB, c-Jun, c-Jun/c-Fos, c-Fos, TNF-alpha                                                   |
| 34 | Immune response_MIF-induced cell adhesion, migration and angiogenesis                                                           | 7  | 49  | 5.19364E-06 | 0.000145258 | AP-1, ICAM1, CCL2, c-Jun, MKP-1, c-Jun/c-Fos, c-Fos                                                         |
| 35 | Activation of TNF-alpha-dependent pro-tumoral effect in colorectal cancer                                                       | 7  | 49  | 5.19364E-06 | 0.000145258 | COX-2 (PTGS2), ICAM1, CCL2, I-kB, c-IAP2, IP10, TNF-alpha                                                   |
| 36 | Immune response_TLR2 and TLR4 signaling pathways                                                                                | 8  | 69  | 5.42529E-06 | 0.000145258 | AP-1, COX-2 (PTGS2), I-kB, TLR2,                                                                            |

|    |                                                                                              |   |    |             |             |                                                              |
|----|----------------------------------------------------------------------------------------------|---|----|-------------|-------------|--------------------------------------------------------------|
|    |                                                                                              |   |    |             |             | c-Jun, CD14, c-Jun/c-Fos, TNF-alpha                          |
| 37 | Glomerular injury in Lupus Nephritis                                                         | 9 | 92 | 5.7891E-06  | 0.000145258 | GRO-3, A20, ICAM1, GRO-2, CCL2, Bcl-2, IP10, NGAL, TNF-alpha |
| 38 | Proteases and EGFR-activated mucin production in airway epithelium in COPD                   | 7 | 50 | 5.9679E-06  | 0.000145258 | AP-1, NFKBIA, Bcl-2, c-Jun, c-Jun/c-Fos, TNF-alpha, ErbB3    |
| 39 | Immune response_C5a signaling                                                                | 7 | 50 | 5.9679E-06  | 0.000145258 | AP-1, I-kB, Bcl-2, c-Jun, c-Jun/c-Fos, c-Fos, TNF-alpha      |
| 40 | Pro-inflammatory action of Gastrin in gastric cancer                                         | 7 | 50 | 5.9679E-06  | 0.000145258 | AP-1, COX-2 (PTGS2), GRO-2, I-kB, c-Jun, c-Jun/c-Fos, c-Fos  |
| 41 | Stellate cells activation and liver fibrosis                                                 | 8 | 70 | 6.05242E-06 | 0.000145258 | ICAM1, GRO-2, CCL2, I-kB, Frizzled, TLR2, c-Fos, TNF-alpha   |
| 42 | Endothelin-1- and TNF-alpha-induced inflammatory response in asthmatic airway fibroblasts    | 5 | 20 | 6.95469E-06 | 0.000162938 | COX-2 (PTGS2), Endothelin-1, ICAM1, MGF, TNF-alpha           |
| 43 | Reproduction_Gonadotropin-releasing hormone (GnRH) signaling                                 | 8 | 73 | 8.31399E-06 | 0.00018885  | AP-1, PER1, ATF-3, c-Jun, MKP-1, c-Jun/c-Fos, FosB, c-Fos    |
| 44 | Cell cycle_ESR1 regulation of G1/S transition                                                | 6 | 35 | 8.44452E-06 | 0.00018885  | p21, CDK4, c-Jun, c-Jun/c-Fos, c-Myc, c-Fos                  |
| 45 | Stem cells_Inflammatory response in ischemia-reperfusion injury during myocardial infarction | 5 | 21 | 9.0241E-06  | 0.000197327 | ICAM1, CCL2, HSP70, TLR2, TNF-alpha                          |
| 46 | Cigarette smoke-induced inflammatory signaling in airway epithelial cells                    | 6 | 36 | 1.00156E-05 | 0.000214247 | COX-2 (PTGS2), ICAM1, NFKBIA, TNF-alpha, ErbB3, sICAM1       |
| 47 | Transcription_Role of AP-1 in regulation of cellular metabolism                              | 6 | 38 | 1.38675E-05 | 0.000284285 | p21, AP-1, PLAUR (uPAR), c-Jun, c-Jun/c-Fos, c-Fos           |
| 48 | Role of Endothelin-1 in inflammation and vasoconstriction in Sickle cell disease             | 6 | 38 | 1.38675E-05 | 0.000284285 | AP-1, Endothelin-1, CCL2, c-Jun, c-Jun/c-Fos, c-Fos          |
| 49 | TGF-beta signaling via kinase cascades in breast cancer                                      | 7 | 58 | 1.63393E-05 | 0.000328119 | AP-1, COX-2 (PTGS2), NFKBIA, c-Jun, c-Fos, TNF-alpha, ErbB3  |

|    |                                                                                                      |   |    |             |             |                                        |
|----|------------------------------------------------------------------------------------------------------|---|----|-------------|-------------|----------------------------------------|
| 50 | IFN-gamma and Th2 cytokines-induced inflammatory signaling in normal and asthmatic airway epithelium | 6 | 40 | 1.88357E-05 | 0.000370687 | ICAM1, CCL2, CCL17, SOCS3, IL4RA, IP10 |
|----|------------------------------------------------------------------------------------------------------|---|----|-------------|-------------|----------------------------------------|

**Table S7. Top-ranked significantly altered pathways based on ischemia followed by reperfusion-induced gene expression changes in mouse brains (IR/Sham).**

| #  | Maps                                                                                                        | Active Genes | Total in Pathway | p-value  | FD R     | Network Objects from Active Data                       |
|----|-------------------------------------------------------------------------------------------------------------|--------------|------------------|----------|----------|--------------------------------------------------------|
| 1  | Chemokines in inflammation in adipose tissue and liver in obesity, type 2 diabetes and metabolic syndrome X | 4            | 48               | 1.16E-04 | 2.66E-02 | PLAUR (uPAR), CX3CR1, CCL2, CD86                       |
| 2  | Transcription_HIF-1 targets                                                                                 | 5            | 95               | 1.41E-04 | 2.66E-02 | p21, PLAUR (uPAR), Endothelin-1, Lysyl oxidase, CX3CR1 |
| 3  | HCV-dependent transcription regulation leading to HCC                                                       | 3            | 21               | 1.75E-04 | 2.66E-02 | p21, HSPA1A, HSP70                                     |
| 4  | T cell generation in COPD                                                                                   | 3            | 25               | 2.98E-04 | 3.39E-02 | CCL2, CCL13, CD86                                      |
| 5  | Immune response_IL-4-responsive genes in type 2 immunity                                                    | 4            | 70               | 5.01E-04 | 4.27E-02 | IL4RA, CCL2, CCL13, CCL17                              |
| 6  | The role of KEAP1/NRF2 pathway in skin sensitization                                                        | 3            | 32               | 6.27E-04 | 4.27E-02 | MafF, MafK, HSP70                                      |
| 7  | The innate immune response to contact allergens                                                             | 3            | 33               | 6.87E-04 | 4.27E-02 | TXNIP (VDUP1), CCL2, HSP70                             |
| 8  | Disruption of epithelial layer restitution in asthma                                                        | 3            | 34               | 7.51E-04 | 4.27E-02 | PLAUR (uPAR), Endothelin-1, RXRG                       |
| 9  | Cooperative action of IFN-gamma and TNF-alpha on astrocytes in multiple sclerosis                           | 3            | 37               | 9.64E-04 | 4.87E-02 | CCL2, CD86, C/EBPdelta                                 |
| 10 | IFN-gamma and Th2 cytokines-induced inflammatory signaling in normal and asthmatic airway epithelium        | 3            | 40               | 1.21E-03 | 5.33E-02 | IL4RA, CCL2, CCL17                                     |
| 11 | Immune response_Substance P-stimulated expression of proinflammatory cytokines via MAPKs                    | 3            | 43               | 1.50E-03 | 5.33E-02 | CCL3L1, CCL2, CCL13                                    |
| 12 | Immune response_IL-13 signaling via JAK-STAT                                                                | 3            | 44               | 1.60E-03 | 5.33E-02 | IL4RA, CCL2, CCL17                                     |

|        |                                                                                                                   |   |    |                  |                  |                                  |
|--------|-------------------------------------------------------------------------------------------------------------------|---|----|------------------|------------------|----------------------------------|
| 1<br>3 | Role of free fatty acids in obesity and type 2 diabetes                                                           | 3 | 45 | 1.7<br>1E<br>-03 | 5.3<br>3E<br>-02 | ATF-3, CCL2, PDK4                |
| 1<br>4 | Differentiation of Th2 cells in asthma                                                                            | 3 | 45 | 1.7<br>1E<br>-03 | 5.3<br>3E<br>-02 | CCL2, CD86, CCL17                |
| 1<br>5 | Dual role of p53 in transcription deregulation in Huntington's Disease                                            | 2 | 12 | 1.7<br>6E<br>-03 | 5.3<br>3E<br>-02 | p21, HSPA1A                      |
| 1<br>6 | Basophil migration in asthma                                                                                      | 3 | 55 | 3.0<br>4E<br>-03 | 8.6<br>5E<br>-02 | PLAUR (uPAR), CCL2, CCL13        |
| 1<br>7 | Immune response_IL-17 signaling pathways                                                                          | 3 | 60 | 3.8<br>9E<br>-03 | 1.0<br>4E<br>-01 | CCL2, NGAL, C/EBPdelta           |
| 1<br>8 | Vascular endothelial cell damage in SLE                                                                           | 3 | 63 | 4.4<br>7E<br>-03 | 1.1<br>2E<br>-01 | Endothelin-1, CCL2, AML1 (RUNX1) |
| 1<br>9 | MAPK-independent proliferation of normal and asthmatic smooth muscle cells                                        | 3 | 64 | 4.6<br>7E<br>-03 | 1.1<br>2E<br>-01 | p21, Endothelin-1, PLAT (TPA)    |
| 2<br>0 | Stem cells_Inflammatory response in ischemia-reperfusion injury during myocardial infarction                      | 2 | 21 | 5.4<br>2E<br>-03 | 1.2<br>3E<br>-01 | CCL2, HSP70                      |
| 2<br>1 | Immune response_Oncostatin M signaling via JAK-Stat                                                               | 2 | 22 | 5.9<br>4E<br>-03 | 1.2<br>8E<br>-01 | OSMR, CCL2                       |
| 2<br>2 | Stem cells_Stimulation of differentiation of mouse embryonic fibroblasts into adipocytes by extracellular factors | 3 | 71 | 6.2<br>4E<br>-03 | 1.2<br>8E<br>-01 | Lysyl oxidase, NGAL, C/EBPdelta  |
| 2<br>3 | Immune response_IL-6 signaling pathway via JAK/STAT                                                               | 3 | 72 | 6.4<br>9E<br>-03 | 1.2<br>8E<br>-01 | p21, CCL2, C/EBPdelta            |
| 2<br>4 | Immune escape mechanisms in Prostate Cancer                                                                       | 2 | 25 | 7.6<br>4E<br>-03 | 1.3<br>9E<br>-01 | CCL2, CCL17                      |
| 2<br>5 | HSP70 and HSP40-dependent folding in Huntington's disease                                                         | 2 | 25 | 7.6<br>4E<br>-03 | 1.3<br>9E<br>-01 | HSPA1A, HSP70                    |
| 2<br>6 | The role of aberrations in CDKN2 locus and CDK4 in familial melanoma                                              | 2 | 28 | 9.5<br>3E<br>-03 | 1.5<br>7E<br>-01 | p21, MIG6                        |
| 2<br>7 | DNA damage_ATM / ATR regulation of G2 / M checkpoint                                                              | 2 | 28 | 9.5<br>3E<br>-03 | 1.5<br>7E<br>-01 | p21, Wee1                        |
| 2<br>8 | Cell cycle_Role of SCF complex in cell cycle regulation                                                           | 2 | 29 | 1.0<br>2E<br>-02 | 1.5<br>7E<br>-01 | p21, Wee1                        |

|    |                                                                                           |   |    |          |          |                          |
|----|-------------------------------------------------------------------------------------------|---|----|----------|----------|--------------------------|
| 29 | Bone metastases in Prostate Cancer                                                        | 2 | 29 | 1.02E-02 | 1.57E-01 | Endothelin-1, CCL2       |
| 30 | Role of adipose tissue hypoxia in obesity and type 2 diabetes                             | 2 | 30 | 1.09E-02 | 1.57E-01 | Lysyl oxidase, CCL2      |
| 31 | Arachidonic acid metabolites production in alveolar macrophages in asthma                 | 2 | 31 | 1.16E-02 | 1.57E-01 | Endothelin-1, CCL2       |
| 32 | T follicular helper cell dysfunction in SLE                                               | 3 | 90 | 1.20E-02 | 1.57E-01 | IL4RA, TLR7, CD86        |
| 33 | Th2 cytokine-induced alternative activation of alveolar macrophages in asthma             | 2 | 32 | 1.23E-02 | 1.57E-01 | IL4RA, CCL17             |
| 34 | IGF family, invasion and metastasis in colorectal cancer                                  | 2 | 33 | 1.31E-02 | 1.57E-01 | PLAUR (uPAR), PLAT (TPA) |
| 35 | Immune response_TLR ligands                                                               | 2 | 34 | 1.39E-02 | 1.57E-01 | TLR7, HSP70              |
| 36 | Macrophage-induced immunosuppression in the tumor microenvironment                        | 3 | 96 | 1.42E-02 | 1.57E-01 | CCL2, TIE2, CCL17        |
| 37 | Development_Angiopoietin - Tie2 signaling                                                 | 2 | 35 | 1.46E-02 | 1.57E-01 | p21, TIE2                |
| 38 | Plasminogen activators signaling in pancreatic cancer                                     | 2 | 35 | 1.46E-02 | 1.57E-01 | PLAUR (uPAR), PLAT (TPA) |
| 39 | Th2 cytokine- and TNF-alpha-induced inflammatory response in asthmatic airway fibroblasts | 2 | 35 | 1.46E-02 | 1.57E-01 | IL4RA, CCL2              |
| 40 | Immune response_Antigen presentation by MHC class I: cross-presentation                   | 3 | 99 | 1.54E-02 | 1.57E-01 | HSPA1A, TLR7, HSP70      |
| 41 | Development_Beta adrenergic receptors in brown adipocyte differentiation                  | 2 | 36 | 1.55E-02 | 1.57E-01 | DIO2, C/EBPdelta         |
| 42 | Th17 cytokines in COPD                                                                    | 2 | 36 | 1.55E-02 | 1.57E-01 | CCL2, CD86               |
| 43 | Immune response_Oncostatin M signaling via MAPK                                           | 2 | 37 | 1.63E-02 | 1.57E-01 | OSMR, CCL2               |
| 44 | Immune response_Generation of memory CD4+ T cells                                         | 2 | 37 | 1.63E-02 | 1.57E-01 | IL4RA, CD86              |

|    |                                                                                    |   |    |          |          |                     |
|----|------------------------------------------------------------------------------------|---|----|----------|----------|---------------------|
| 45 | G-protein signaling_H-RAS regulation pathway                                       | 2 | 37 | 1.63E-02 | 1.57E-01 | CaIDAG-GEFIII, TIE2 |
| 46 | Transcription_Role of AP-1 in regulation of cellular metabolism                    | 2 | 38 | 1.71E-02 | 1.57E-01 | p21, PLAUR (uPAR)   |
| 47 | Neutrophil chemotaxis in asthma                                                    | 2 | 38 | 1.71E-02 | 1.57E-01 | CCL2, HSP70         |
| 48 | TNF-alpha-induced inflammatory signaling in normal and asthmatic airway epithelium | 2 | 38 | 1.71E-02 | 1.57E-01 | CCL2, CCL17         |
| 49 | Role of Endothelin-1 in inflammation and vasoconstriction in Sickle cell disease   | 2 | 38 | 1.71E-02 | 1.57E-01 | Endothelin-1, CCL2  |
| 50 | Immune response_TSLP signalling                                                    | 2 | 39 | 1.80E-02 | 1.57E-01 | CCL2, CCL17         |

**Table S8. Predicted brain miRNA regulatory modules associated with ischemia and reperfusion in mice.**

| Comparison | miRNA          | Gene Symbol   | miRNA Fold Change | mRNA Fold Change |
|------------|----------------|---------------|-------------------|------------------|
| InoR/Sham  | mmu-miR-770-3p | 1110057K04Rik | 7.81              | -1.54            |
| InoR/Sham  | mmu-miR-744-5p | 1110057K04Rik | 3.70              | -1.54            |
| InoR/Sham  | mmu-miR-674-5p | 1110057K04Rik | 2.40              | -1.54            |
| InoR/Sham  | mmu-miR-874-3p | 1110057K04Rik | 4.55              | -1.54            |
| InoR/Sham  | mmu-miR-540-3p | 3110052M02Rik | 2.68              | -1.99            |
| InoR/Sham  | mmu-miR-770-3p | 3110052M02Rik | 7.81              | -1.99            |
| InoR/Sham  | mmu-miR-452-5p | 3110052M02Rik | 1.88              | -1.99            |
| InoR/Sham  | mmu-miR-224-5p | 8430408G22Rik | -3.47             | 4.13             |
| InoR/Sham  | mmu-miR-488-3p | 8430408G22Rik | -2.17             | 4.13             |
| InoR/Sham  | mmu-miR-335-5p | Abhd2         | -3.30             | 1.58             |
| InoR/Sham  | mmu-miR-489-3p | Abhd2         | -2.47             | 1.58             |
| InoR/Sham  | mmu-miR-488-3p | Abhd2         | -2.17             | 1.58             |
| InoR/Sham  | mmu-miR-335-5p | Acr           | -3.30             | 2.14             |
| InoR/Sham  | mmu-miR-542-5p | Acss1         | 3.09              | -1.53            |
| InoR/Sham  | mmu-miR-674-5p | Acss1         | 2.40              | -1.53            |
| InoR/Sham  | mmu-let-7d-5p  | Acss1         | 2.93              | -1.53            |

|           |                 |          |       |       |
|-----------|-----------------|----------|-------|-------|
| InoR/Sham | mmu-miR-193a-3p | Acss1    | 6.27  | -1.53 |
| InoR/Sham | mmu-miR-874-3p  | Acss1    | 4.55  | -1.53 |
| InoR/Sham | mmu-miR-540-3p  | Acss1    | 2.68  | -1.53 |
| InoR/Sham | mmu-miR-489-3p  | Adamts9  | -2.47 | 2.64  |
| InoR/Sham | mmu-miR-224-5p  | Aff1     | -3.47 | 1.77  |
| InoR/Sham | mmu-miR-335-5p  | Aff1     | -3.30 | 1.77  |
| InoR/Sham | mmu-miR-190a-5p | Aff1     | -2.22 | 1.77  |
| InoR/Sham | mmu-miR-488-3p  | Aff1     | -2.17 | 1.77  |
| InoR/Sham | mmu-miR-452-5p  | Ahsa2    | 1.88  | -1.55 |
| InoR/Sham | mmu-miR-540-3p  | Ahsa2    | 2.68  | -1.55 |
| InoR/Sham | mmu-miR-770-3p  | Akr1e1   | 7.81  | -1.62 |
| InoR/Sham | mmu-miR-452-5p  | Akr1e1   | 1.88  | -1.62 |
| InoR/Sham | mmu-miR-335-5p  | Alpk3    | -3.30 | 1.77  |
| InoR/Sham | mmu-miR-489-3p  | Alpk3    | -2.47 | 1.77  |
| InoR/Sham | mmu-miR-488-3p  | Alpk3    | -2.17 | 1.77  |
| InoR/Sham | mmu-miR-224-5p  | Angptl4  | -3.47 | 1.70  |
| InoR/Sham | mmu-miR-489-3p  | Angptl4  | -2.47 | 1.70  |
| InoR/Sham | mmu-miR-452-5p  | Ankrd27  | 1.88  | -1.54 |
| InoR/Sham | mmu-miR-540-3p  | Ankrd27  | 2.68  | -1.54 |
| InoR/Sham | mmu-miR-488-3p  | Ankrd33b | -2.17 | 1.55  |
| InoR/Sham | mmu-miR-224-5p  | Ankrd33b | -3.47 | 1.55  |
| InoR/Sham | mmu-miR-874-3p  | Anpep    | 4.55  | -1.76 |
| InoR/Sham | mmu-miR-540-3p  | Anxa3    | 2.68  | -1.65 |
| InoR/Sham | mmu-miR-874-3p  | Anxa3    | 4.55  | -1.65 |
| InoR/Sham | mmu-miR-224-5p  | Apold1   | -3.47 | 3.60  |
| InoR/Sham | mmu-miR-744-5p  | Arc      | 3.70  | -2.41 |
| InoR/Sham | mmu-miR-542-5p  | Arc      | 3.09  | -2.41 |
| InoR/Sham | mmu-let-7d-5p   | Arc      | 2.93  | -2.41 |
| InoR/Sham | mmu-miR-193a-3p | Arc      | 6.27  | -2.41 |
| InoR/Sham | mmu-miR-874-3p  | Arc      | 4.55  | -2.41 |
| InoR/Sham | mmu-miR-193a-3p | Armc2    | 6.27  | -1.68 |
| InoR/Sham | mmu-let-7d-5p   | Armc2    | 2.93  | -1.68 |
| InoR/Sham | mmu-miR-190a-5p | Arrdc4   | -2.22 | 1.63  |
| InoR/Sham | mmu-miR-488-3p  | Arrdc4   | -2.17 | 1.63  |
| InoR/Sham | mmu-miR-488-3p  | Atf3     | -2.17 | 4.55  |
| InoR/Sham | mmu-miR-190a-5p | Atf3     | -2.22 | 4.55  |
| InoR/Sham | mmu-miR-224-5p  | Atf3     | -3.47 | 4.55  |
| InoR/Sham | mmu-miR-335-5p  | Atf3     | -3.30 | 4.55  |
| InoR/Sham | mmu-miR-452-5p  | Bcl2     | 1.88  | -1.53 |

|           |                 |         |       |       |
|-----------|-----------------|---------|-------|-------|
| InoR/Sham | mmu-miR-674-5p  | Bcl2    | 2.40  | -1.53 |
| InoR/Sham | mmu-miR-467d-5p | Bet1    | 2.46  | -1.90 |
| InoR/Sham | mmu-miR-540-3p  | Bet1    | 2.68  | -1.90 |
| InoR/Sham | mmu-let-7d-5p   | Bet1    | 2.93  | -1.90 |
| InoR/Sham | mmu-miR-674-5p  | Bet1    | 2.40  | -1.90 |
| InoR/Sham | mmu-miR-770-3p  | Bet1    | 7.81  | -1.90 |
| InoR/Sham | mmu-miR-193a-3p | Bet1    | 6.27  | -1.90 |
| InoR/Sham | mmu-miR-489-3p  | Birc3   | -2.47 | 1.69  |
| InoR/Sham | mmu-miR-335-5p  | Birc3   | -3.30 | 1.69  |
| InoR/Sham | mmu-miR-488-3p  | Blnk    | -2.17 | 1.63  |
| InoR/Sham | mmu-miR-190a-5p | Blnk    | -2.22 | 1.63  |
| InoR/Sham | mmu-miR-190a-5p | Btg3    | -2.22 | 1.75  |
| InoR/Sham | mmu-miR-224-5p  | C8b     | -3.47 | 1.82  |
| InoR/Sham | mmu-miR-335-5p  | C8b     | -3.30 | 1.82  |
| InoR/Sham | mmu-miR-193a-3p | Calcl   | 6.27  | -1.63 |
| InoR/Sham | mmu-miR-540-3p  | Calcl   | 2.68  | -1.63 |
| InoR/Sham | mmu-miR-452-5p  | Calcl   | 1.88  | -1.63 |
| InoR/Sham | mmu-miR-489-3p  | Cc2d1b  | -2.47 | 1.74  |
| InoR/Sham | mmu-miR-224-5p  | Cc2d1b  | -3.47 | 1.74  |
| InoR/Sham | mmu-miR-335-5p  | Cc2d1b  | -3.30 | 1.74  |
| InoR/Sham | mmu-miR-488-3p  | Cc2d1b  | -2.17 | 1.74  |
| InoR/Sham | mmu-miR-193a-3p | Ccdc28a | 6.27  | -1.57 |
| InoR/Sham | mmu-miR-488-3p  | Ccl2    | -2.17 | 2.80  |
| InoR/Sham | mmu-miR-489-3p  | Ccl3    | -2.47 | 21.18 |
| InoR/Sham | mmu-miR-335-5p  | Ccnl1   | -3.30 | 1.56  |
| InoR/Sham | mmu-miR-190a-5p | Ccnl1   | -2.22 | 1.56  |
| InoR/Sham | mmu-miR-224-5p  | Ccnl1   | -3.47 | 1.56  |
| InoR/Sham | mmu-miR-335-5p  | Ccrl2   | -3.30 | 3.55  |
| InoR/Sham | mmu-miR-488-3p  | Ccrl2   | -2.17 | 3.55  |
| InoR/Sham | mmu-miR-488-3p  | Cd86    | -2.17 | 1.68  |
| InoR/Sham | mmu-miR-770-3p  | Cdh10   | 7.81  | -1.55 |
| InoR/Sham | mmu-miR-674-5p  | Cdh10   | 2.40  | -1.55 |
| InoR/Sham | mmu-miR-193a-3p | Cdh10   | 6.27  | -1.55 |
| InoR/Sham | mmu-miR-874-3p  | Cdh11   | 4.55  | -1.50 |
| InoR/Sham | mmu-miR-674-5p  | Cdh11   | 2.40  | -1.50 |
| InoR/Sham | mmu-miR-190a-5p | Cdh5    | -2.22 | 1.93  |

|           |                 |         |       |       |
|-----------|-----------------|---------|-------|-------|
| InoR/Sham | mmu-let-7d-5p   | Cdk4    | 2.93  | -1.54 |
| InoR/Sham | mmu-miR-335-5p  | Cdkn1a  | -3.30 | 3.97  |
| InoR/Sham | mmu-miR-224-5p  | Cdkn1a  | -3.47 | 3.97  |
| InoR/Sham | mmu-miR-335-5p  | Cenpa   | -3.30 | 1.92  |
| InoR/Sham | mmu-miR-190a-5p | Cenpa   | -2.22 | 1.92  |
| InoR/Sham | mmu-miR-542-5p  | Chac2   | 3.09  | -2.03 |
| InoR/Sham | mmu-miR-674-5p  | Chac2   | 2.40  | -2.03 |
| InoR/Sham | mmu-miR-452-5p  | Chac2   | 1.88  | -2.03 |
| InoR/Sham | mmu-let-7d-5p   | Chac2   | 2.93  | -2.03 |
| InoR/Sham | mmu-miR-540-3p  | Chac2   | 2.68  | -2.03 |
| InoR/Sham | mmu-miR-467d-5p | Chordc1 | 2.46  | -1.75 |
| InoR/Sham | mmu-let-7d-5p   | Cml5    | 2.93  | -1.79 |
| InoR/Sham | mmu-miR-467d-5p | Cog6    | 2.46  | -1.58 |
| InoR/Sham | mmu-miR-193a-3p | Coq3    | 6.27  | -1.52 |
| InoR/Sham | mmu-miR-540-3p  | Coq3    | 2.68  | -1.52 |
| InoR/Sham | mmu-miR-467d-5p | Coq3    | 2.46  | -1.52 |
| InoR/Sham | mmu-miR-674-5p  | Coq3    | 2.40  | -1.52 |
| InoR/Sham | mmu-miR-224-5p  | Cry1    | -3.47 | 1.59  |
| InoR/Sham | mmu-miR-489-3p  | Cry1    | -2.47 | 1.59  |
| InoR/Sham | mmu-miR-488-3p  | Csrnp1  | -2.17 | 2.07  |
| InoR/Sham | mmu-miR-335-5p  | Csrnp1  | -3.30 | 2.07  |
| InoR/Sham | mmu-miR-190a-5p | Ctla2a  | -2.22 | 2.66  |
| InoR/Sham | mmu-let-7d-5p   | Cx3cr1  | 2.93  | -1.80 |
| InoR/Sham | mmu-miR-540-3p  | Cx3cr1  | 2.68  | -1.80 |
| InoR/Sham | mmu-miR-874-3p  | Cx3cr1  | 4.55  | -1.80 |
| InoR/Sham | mmu-miR-674-5p  | Cx3cr1  | 2.40  | -1.80 |
| InoR/Sham | mmu-miR-190a-5p | Cxadr   | -2.22 | 1.55  |
| InoR/Sham | mmu-miR-488-3p  | Cxadr   | -2.17 | 1.55  |
| InoR/Sham | mmu-miR-224-5p  | Cxadr   | -3.47 | 1.55  |
| InoR/Sham | mmu-miR-335-5p  | Cxadr   | -3.30 | 1.55  |
| InoR/Sham | mmu-miR-489-3p  | Cxcl10  | -2.47 | 3.13  |
| InoR/Sham | mmu-miR-489-3p  | Dcaf10  | -2.47 | 1.59  |
| InoR/Sham | mmu-miR-335-5p  | Dcaf10  | -3.30 | 1.59  |
| InoR/Sham | mmu-miR-224-5p  | Dcaf10  | -3.47 | 1.59  |
| InoR/Sham | mmu-miR-190a-5p | Dcaf10  | -2.22 | 1.59  |
| InoR/Sham | mmu-let-7d-5p   | Dcun1d2 | 2.93  | -1.74 |
| InoR/Sham | mmu-miR-540-3p  | Dcun1d2 | 2.68  | -1.74 |

|           |                 |         |       |       |
|-----------|-----------------|---------|-------|-------|
| InoR/Sham | mmu-miR-193a-3p | Dcun1d2 | 6.27  | -1.74 |
| InoR/Sham | mmu-let-7d-5p   | Ddit4l  | 2.93  | -1.57 |
| InoR/Sham | mmu-miR-193a-3p | Ddit4l  | 6.27  | -1.57 |
| InoR/Sham | mmu-miR-224-5p  | Dennd3  | -3.47 | 3.01  |
| InoR/Sham | mmu-miR-770-3p  | Dnajc28 | 7.81  | -1.56 |
| InoR/Sham | mmu-let-7d-5p   | Dnajc28 | 2.93  | -1.56 |
| InoR/Sham | mmu-miR-452-5p  | Dnajc28 | 1.88  | -1.56 |
| InoR/Sham | mmu-miR-874-3p  | Dnajc28 | 4.55  | -1.56 |
| InoR/Sham | mmu-miR-540-3p  | Dnajc28 | 2.68  | -1.56 |
| InoR/Sham | mmu-miR-874-3p  | Dscr3   | 4.55  | -1.50 |
| InoR/Sham | mmu-miR-193a-3p | Dscr3   | 6.27  | -1.50 |
| InoR/Sham | mmu-miR-467d-5p | Dscr3   | 2.46  | -1.50 |
| InoR/Sham | mmu-let-7d-5p   | Dscr3   | 2.93  | -1.50 |
| InoR/Sham | mmu-miR-335-5p  | Dusp1   | -3.30 | 1.67  |
| InoR/Sham | mmu-miR-488-3p  | Dusp1   | -2.17 | 1.67  |
| InoR/Sham | mmu-miR-674-5p  | E2f6    | 2.40  | -1.89 |
| InoR/Sham | mmu-let-7d-5p   | E2f6    | 2.93  | -1.89 |
| InoR/Sham | mmu-miR-193a-3p | E2f6    | 6.27  | -1.89 |
| InoR/Sham | mmu-miR-489-3p  | Edn1    | -2.47 | 2.10  |
| InoR/Sham | mmu-miR-540-3p  | Egr2    | 2.68  | -2.06 |
| InoR/Sham | mmu-miR-674-5p  | Elmod2  | 2.40  | -1.50 |
| InoR/Sham | mmu-miR-452-5p  | Elmod2  | 1.88  | -1.50 |
| InoR/Sham | mmu-miR-335-5p  | Emp1    | -3.30 | 2.07  |
| InoR/Sham | mmu-miR-335-5p  | Errfi1  | -3.30 | 1.81  |
| InoR/Sham | mmu-miR-488-3p  | Errfi1  | -2.17 | 1.81  |
| InoR/Sham | mmu-miR-674-5p  | Fa2h    | 2.40  | -1.66 |
| InoR/Sham | mmu-miR-467d-5p | Fam161b | 2.46  | -1.57 |
| InoR/Sham | mmu-miR-674-5p  | Fmo1    | 2.40  | -1.61 |
| InoR/Sham | mmu-miR-674-5p  | Fn3krp  | 2.40  | -1.54 |
| InoR/Sham | mmu-miR-489-3p  | Fnip2   | -2.47 | 1.57  |
| InoR/Sham | mmu-miR-224-5p  | Fosb    | -3.47 | 2.15  |
| InoR/Sham | mmu-miR-744-5p  | Fv1     | 3.70  | -1.56 |
| InoR/Sham | mmu-miR-467d-5p | Fv1     | 2.46  | -1.56 |
| InoR/Sham | mmu-miR-489-3p  | Fzd4    | -2.47 | 1.97  |
| InoR/Sham | mmu-miR-224-5p  | Fzd4    | -3.47 | 1.97  |
| InoR/Sham | mmu-miR-488-3p  | Fzd4    | -2.17 | 1.97  |
| InoR/Sham | mmu-miR-488-3p  | Gadd45g | -2.17 | 2.61  |
| InoR/Sham | mmu-miR-224-5p  | Gadd45g | -3.47 | 2.61  |

|           |                 |         |       |       |
|-----------|-----------------|---------|-------|-------|
| InoR/Sham | mmu-miR-224-5p  | Gas2l3  | -3.47 | 1.73  |
| InoR/Sham | mmu-miR-488-3p  | Gas2l3  | -2.17 | 1.73  |
| InoR/Sham | mmu-miR-335-5p  | Gimap6  | -3.30 | 1.56  |
| InoR/Sham | mmu-miR-224-5p  | Gimap6  | -3.47 | 1.56  |
| InoR/Sham | mmu-miR-489-3p  | Gjb2    | -2.47 | 2.09  |
| InoR/Sham | mmu-miR-488-3p  | Gmeb2   | -2.17 | 1.53  |
| InoR/Sham | mmu-miR-224-5p  | Gmeb2   | -3.47 | 1.53  |
| InoR/Sham | mmu-miR-335-5p  | Gmeb2   | -3.30 | 1.53  |
| InoR/Sham | mmu-miR-540-3p  | Gnpda2  | 2.68  | -2.00 |
| InoR/Sham | mmu-miR-452-5p  | Gnpda2  | 1.88  | -2.00 |
| InoR/Sham | mmu-miR-542-5p  | Gnpda2  | 3.09  | -2.00 |
| InoR/Sham | mmu-miR-193a-3p | Golph3l | 6.27  | -1.50 |
| InoR/Sham | mmu-miR-540-3p  | Golph3l | 2.68  | -1.50 |
| InoR/Sham | mmu-miR-452-5p  | Golph3l | 1.88  | -1.50 |
| InoR/Sham | mmu-miR-874-3p  | Golph3l | 4.55  | -1.50 |
| InoR/Sham | mmu-miR-540-3p  | Gpr17   | 2.68  | -2.56 |
| InoR/Sham | mmu-miR-674-5p  | Gpr17   | 2.40  | -2.56 |
| InoR/Sham | mmu-miR-770-3p  | Gpr17   | 7.81  | -2.56 |
| InoR/Sham | mmu-miR-874-3p  | Gpr17   | 4.55  | -2.56 |
| InoR/Sham | mmu-miR-224-5p  | H3f3b   | -3.47 | 1.64  |
| InoR/Sham | mmu-miR-335-5p  | H3f3b   | -3.30 | 1.64  |
| InoR/Sham | mmu-miR-335-5p  | Hao1    | -3.30 | 2.86  |
| InoR/Sham | mmu-miR-190a-5p | Hao1    | -2.22 | 2.86  |
| InoR/Sham | mmu-miR-489-3p  | Hao1    | -2.47 | 2.86  |
| InoR/Sham | mmu-miR-674-5p  | Hibch   | 2.40  | -1.54 |
| InoR/Sham | mmu-miR-770-3p  | Hibch   | 7.81  | -1.54 |
| InoR/Sham | mmu-miR-190a-5p | Hmgb3   | -2.22 | 1.53  |
| InoR/Sham | mmu-miR-540-3p  | Homer2  | 2.68  | -1.73 |
| InoR/Sham | mmu-miR-452-5p  | Homer2  | 1.88  | -1.73 |
| InoR/Sham | mmu-miR-467d-5p | Homer2  | 2.46  | -1.73 |
| InoR/Sham | mmu-miR-770-3p  | Homer2  | 7.81  | -1.73 |
| InoR/Sham | mmu-let-7d-5p   | Homer2  | 2.93  | -1.73 |
| InoR/Sham | mmu-miR-874-3p  | Homer2  | 4.55  | -1.73 |
| InoR/Sham | mmu-miR-193a-3p | Homer2  | 6.27  | -1.73 |
| InoR/Sham | mmu-miR-193a-3p | Hpgd    | 6.27  | -2.11 |
| InoR/Sham | mmu-miR-193a-3p | Htr1b   | 6.27  | -1.56 |
| InoR/Sham | mmu-miR-674-5p  | Htr1b   | 2.40  | -1.56 |
| InoR/Sham | mmu-miR-874-3p  | Htr1b   | 4.55  | -1.56 |

|           |                 |        |       |       |
|-----------|-----------------|--------|-------|-------|
| InoR/Sham | mmu-miR-488-3p  | Iffo2  | -2.17 | 1.71  |
| InoR/Sham | mmu-miR-335-5p  | Iffo2  | -3.30 | 1.71  |
| InoR/Sham | mmu-miR-489-3p  | Iffo2  | -2.47 | 1.71  |
| InoR/Sham | mmu-miR-488-3p  | Ifrd1  | -2.17 | 1.60  |
| InoR/Sham | mmu-miR-674-5p  | Il10rb | 2.40  | -1.54 |
| InoR/Sham | mmu-miR-540-3p  | Il10rb | 2.68  | -1.54 |
| InoR/Sham | mmu-miR-874-3p  | Il10rb | 4.55  | -1.54 |
| InoR/Sham | mmu-miR-489-3p  | Il1a   | -2.47 | 3.46  |
| InoR/Sham | mmu-miR-488-3p  | Il1a   | -2.17 | 3.46  |
| InoR/Sham | mmu-miR-335-5p  | Il4ra  | -3.30 | 1.68  |
| InoR/Sham | mmu-miR-224-5p  | Il4ra  | -3.47 | 1.68  |
| InoR/Sham | mmu-miR-193a-3p | Inhba  | 6.27  | -1.52 |
| InoR/Sham | mmu-miR-452-5p  | Inhba  | 1.88  | -1.52 |
| InoR/Sham | mmu-miR-224-5p  | Irak3  | -3.47 | 1.95  |
| InoR/Sham | mmu-miR-190a-5p | Irak3  | -2.22 | 1.95  |
| InoR/Sham | mmu-miR-193a-3p | Kbtbd3 | 6.27  | -1.71 |
| InoR/Sham | mmu-miR-540-3p  | Kbtbd3 | 2.68  | -1.71 |
| InoR/Sham | mmu-miR-452-5p  | Kbtbd3 | 1.88  | -1.71 |
| InoR/Sham | mmu-miR-770-3p  | Kbtbd3 | 7.81  | -1.71 |
| InoR/Sham | mmu-miR-674-5p  | Kbtbd3 | 2.40  | -1.71 |
| InoR/Sham | mmu-let-7d-5p   | Kbtbd3 | 2.93  | -1.71 |
| InoR/Sham | mmu-miR-874-3p  | Kbtbd3 | 4.55  | -1.71 |
| InoR/Sham | mmu-miR-488-3p  | Kcng3  | -2.17 | 1.51  |
| InoR/Sham | mmu-miR-489-3p  | Kcng3  | -2.47 | 1.51  |
| InoR/Sham | mmu-miR-224-5p  | Kcng3  | -3.47 | 1.51  |
| InoR/Sham | mmu-miR-335-5p  | Kcng3  | -3.30 | 1.51  |
| InoR/Sham | mmu-miR-190a-5p | Kcng3  | -2.22 | 1.51  |
| InoR/Sham | mmu-let-7d-5p   | Kctd21 | 2.93  | -2.27 |
| InoR/Sham | mmu-miR-193a-3p | Kctd21 | 6.27  | -2.27 |
| InoR/Sham | mmu-miR-874-3p  | Kctd21 | 4.55  | -2.27 |
| InoR/Sham | mmu-miR-452-5p  | Kctd21 | 1.88  | -2.27 |
| InoR/Sham | mmu-miR-224-5p  | Kif23  | -3.47 | 1.64  |
| InoR/Sham | mmu-miR-674-5p  | Kitl   | 2.40  | -1.53 |
| InoR/Sham | mmu-miR-193a-3p | Lig4   | 6.27  | -1.51 |
| InoR/Sham | mmu-miR-674-5p  | Lix1l  | 2.40  | -1.51 |
| InoR/Sham | mmu-let-7d-5p   | Lix1l  | 2.93  | -1.51 |
| InoR/Sham | mmu-miR-488-3p  | Lox    | -2.17 | 1.50  |
| InoR/Sham | mmu-miR-224-5p  | Lox    | -3.47 | 1.50  |
| InoR/Sham | mmu-miR-489-3p  | Lox    | -2.47 | 1.50  |

|           |                 |          |       |       |
|-----------|-----------------|----------|-------|-------|
| InoR/Sham | mmu-miR-224-5p  | Lrrc32   | -3.47 | 1.76  |
| InoR/Sham | mmu-let-7d-5p   | Ly6a     | 2.93  | -1.97 |
| InoR/Sham | mmu-miR-674-5p  | Ly6a     | 2.40  | -1.97 |
| InoR/Sham | mmu-miR-467d-5p | Ly6a     | 2.46  | -1.97 |
| InoR/Sham | mmu-miR-770-3p  | Ly6a     | 7.81  | -1.97 |
| InoR/Sham | mmu-miR-874-3p  | Ly6c1    | 4.55  | -1.63 |
| InoR/Sham | mmu-miR-874-3p  | Macrod2  | 4.55  | -1.52 |
| InoR/Sham | mmu-miR-224-5p  | Maff     | -3.47 | 2.30  |
| InoR/Sham | mmu-let-7d-5p   | Mettl4   | 2.93  | -1.67 |
| InoR/Sham | mmu-miR-452-5p  | Mettl4   | 1.88  | -1.67 |
| InoR/Sham | mmu-miR-193a-3p | Mettl7a1 | 6.27  | -1.97 |
| InoR/Sham | mmu-miR-770-3p  | Mettl7a1 | 7.81  | -1.97 |
| InoR/Sham | mmu-miR-674-5p  | Mis12    | 2.40  | -1.61 |
| InoR/Sham | mmu-miR-874-3p  | Mis12    | 4.55  | -1.61 |
| InoR/Sham | mmu-miR-874-3p  | Mitd1    | 4.55  | -1.65 |
| InoR/Sham | mmu-miR-674-5p  | Mrpl51   | 2.40  | -1.55 |
| InoR/Sham | mmu-let-7d-5p   | Mrpl51   | 2.93  | -1.55 |
| InoR/Sham | mmu-miR-452-5p  | Mrpl51   | 1.88  | -1.55 |
| InoR/Sham | mmu-miR-874-3p  | Mtcp1    | 4.55  | -1.53 |
| InoR/Sham | mmu-miR-674-5p  | Ncbp2    | 2.40  | -1.57 |
| InoR/Sham | mmu-miR-540-3p  | Ndp      | 2.68  | -1.68 |
| InoR/Sham | mmu-miR-190a-5p | Nedd9    | -2.22 | 1.62  |
| InoR/Sham | mmu-miR-488-3p  | Nedd9    | -2.17 | 1.62  |
| InoR/Sham | mmu-miR-452-5p  | Nek1     | 1.88  | -1.53 |
| InoR/Sham | mmu-miR-674-5p  | Nfe2l2   | 2.40  | -2.17 |
| InoR/Sham | mmu-miR-488-3p  | Nfkbiz   | -2.17 | 1.78  |
| InoR/Sham | mmu-miR-335-5p  | Nfkbiz   | -3.30 | 1.78  |
| InoR/Sham | mmu-miR-452-5p  | Nme7     | 1.88  | -1.51 |
| InoR/Sham | mmu-miR-540-3p  | Nme7     | 2.68  | -1.51 |
| InoR/Sham | mmu-miR-335-5p  | Nptx2    | -3.30 | 1.75  |
| InoR/Sham | mmu-let-7d-5p   | Nudt5    | 2.93  | -1.60 |
| InoR/Sham | mmu-miR-452-5p  | Nudt5    | 1.88  | -1.60 |
| InoR/Sham | mmu-miR-744-5p  | Nudt5    | 3.70  | -1.60 |
| InoR/Sham | mmu-miR-540-3p  | Nudt5    | 2.68  | -1.60 |
| InoR/Sham | mmu-miR-467d-5p | Nudt5    | 2.46  | -1.60 |
| InoR/Sham | mmu-miR-224-5p  | Olf920   | -3.47 | 2.43  |
| InoR/Sham | mmu-miR-489-3p  | Olf920   | -2.47 | 2.43  |
| InoR/Sham | mmu-miR-190a-5p | Olf920   | -2.22 | 2.43  |
| InoR/Sham | mmu-miR-540-3p  | Otub2    | 2.68  | -1.71 |

|           |                 |        |       |       |
|-----------|-----------------|--------|-------|-------|
| InoR/Sham | mmu-miR-874-3p  | Otub2  | 4.55  | -1.71 |
| InoR/Sham | mmu-miR-452-5p  | Otub2  | 1.88  | -1.71 |
| InoR/Sham | mmu-miR-193a-3p | Otub2  | 6.27  | -1.71 |
| InoR/Sham | mmu-miR-770-3p  | Oxnad1 | 7.81  | -1.53 |
| InoR/Sham | mmu-miR-674-5p  | Oxnad1 | 2.40  | -1.53 |
| InoR/Sham | mmu-miR-452-5p  | P2ry13 | 1.88  | -1.89 |
| InoR/Sham | mmu-miR-540-3p  | P2ry13 | 2.68  | -1.89 |
| InoR/Sham | mmu-miR-674-5p  | Papola | 2.40  | -1.53 |
| InoR/Sham | mmu-miR-193a-3p | Papola | 6.27  | -1.53 |
| InoR/Sham | mmu-miR-452-5p  | Papola | 1.88  | -1.53 |
| InoR/Sham | mmu-miR-540-3p  | Pcdh18 | 2.68  | -1.55 |
| InoR/Sham | mmu-miR-674-5p  | Pcdh18 | 2.40  | -1.55 |
| InoR/Sham | mmu-miR-489-3p  | Per1   | -2.47 | 2.10  |
| InoR/Sham | mmu-miR-874-3p  | Pigc   | 4.55  | -1.50 |
| InoR/Sham | mmu-miR-452-5p  | Pigc   | 1.88  | -1.50 |
| InoR/Sham | mmu-miR-540-3p  | Pigc   | 2.68  | -1.50 |
| InoR/Sham | mmu-miR-193a-3p | Pigh   | 6.27  | -1.57 |
| InoR/Sham | mmu-miR-452-5p  | Pigh   | 1.88  | -1.57 |
| InoR/Sham | mmu-miR-190a-5p | Plat   | -2.22 | 1.87  |
| InoR/Sham | mmu-miR-335-5p  | Plaur  | -3.30 | 2.07  |
| InoR/Sham | mmu-miR-224-5p  | Plaur  | -3.47 | 2.07  |
| InoR/Sham | mmu-miR-488-3p  | Plek   | -2.17 | 1.76  |
| InoR/Sham | mmu-miR-224-5p  | Plek   | -3.47 | 1.76  |
| InoR/Sham | mmu-miR-467d-5p | Polk   | 2.46  | -1.57 |
| InoR/Sham | mmu-miR-770-3p  | Pot1a  | 7.81  | -1.78 |
| InoR/Sham | mmu-miR-874-3p  | Pot1a  | 4.55  | -1.78 |
| InoR/Sham | mmu-miR-452-5p  | Pot1a  | 1.88  | -1.78 |
| InoR/Sham | mmu-miR-674-5p  | Pot1a  | 2.40  | -1.78 |
| InoR/Sham | mmu-miR-674-5p  | Pot1b  | 2.40  | -1.58 |
| InoR/Sham | mmu-miR-540-3p  | Pot1b  | 2.68  | -1.58 |
| InoR/Sham | mmu-miR-452-5p  | Pot1b  | 1.88  | -1.58 |
| InoR/Sham | mmu-miR-674-5p  | Pou3f4 | 2.40  | -1.96 |
| InoR/Sham | mmu-miR-874-3p  | Pou3f4 | 4.55  | -1.96 |
| InoR/Sham | mmu-let-7d-5p   | Ppil6  | 2.93  | -1.62 |
| InoR/Sham | mmu-miR-452-5p  | Ppil6  | 1.88  | -1.62 |
| InoR/Sham | mmu-miR-193a-3p | Ppil6  | 6.27  | -1.62 |
| InoR/Sham | mmu-miR-467d-5p | Prelp  | 2.46  | -1.55 |
| InoR/Sham | mmu-miR-744-5p  | Prelp  | 3.70  | -1.55 |

|           |                 |          |       |       |
|-----------|-----------------|----------|-------|-------|
| InoR/Sham | mmu-miR-770-3p  | Prelp    | 7.81  | -1.55 |
| InoR/Sham | mmu-let-7d-5p   | Prelp    | 2.93  | -1.55 |
| InoR/Sham | mmu-let-7d-5p   | Prrx1    | 2.93  | -1.53 |
| InoR/Sham | mmu-miR-674-5p  | Prrx1    | 2.40  | -1.53 |
| InoR/Sham | mmu-miR-540-3p  | Prrx1    | 2.68  | -1.53 |
| InoR/Sham | mmu-miR-467d-5p | Ptchd1   | 2.46  | -1.55 |
| InoR/Sham | mmu-miR-874-3p  | Ptchd1   | 4.55  | -1.55 |
| InoR/Sham | mmu-miR-452-5p  | Ptchd1   | 1.88  | -1.55 |
| InoR/Sham | mmu-miR-674-5p  | Ptpn2    | 2.40  | -2.27 |
| InoR/Sham | mmu-miR-193a-3p | Ptpn2    | 6.27  | -2.27 |
| InoR/Sham | mmu-let-7d-5p   | Ptpn2    | 2.93  | -2.27 |
| InoR/Sham | mmu-miR-452-5p  | Ptpn2    | 1.88  | -2.27 |
| InoR/Sham | mmu-miR-744-5p  | Ptpn2    | 3.70  | -2.27 |
| InoR/Sham | mmu-miR-674-5p  | Ranbp3l  | 2.40  | -1.77 |
| InoR/Sham | mmu-miR-874-3p  | Ranbp3l  | 4.55  | -1.77 |
| InoR/Sham | mmu-miR-224-5p  | Rasd1    | -3.47 | 1.72  |
| InoR/Sham | mmu-miR-540-3p  | Rasgrp3  | 2.68  | -1.61 |
| InoR/Sham | mmu-miR-542-5p  | Rasgrp3  | 3.09  | -1.61 |
| InoR/Sham | mmu-let-7d-5p   | Rasgrp3  | 2.93  | -1.61 |
| InoR/Sham | mmu-miR-452-5p  | Rasgrp3  | 1.88  | -1.61 |
| InoR/Sham | mmu-miR-542-5p  | Rbbp9    | 3.09  | -1.62 |
| InoR/Sham | mmu-miR-224-5p  | Rel      | -3.47 | 2.11  |
| InoR/Sham | mmu-miR-335-5p  | Rel      | -3.30 | 2.11  |
| InoR/Sham | mmu-miR-488-3p  | Rel      | -2.17 | 2.11  |
| InoR/Sham | mmu-miR-190a-5p | Rel      | -2.22 | 2.11  |
| InoR/Sham | mmu-miR-335-5p  | Rhoj     | -3.30 | 1.69  |
| InoR/Sham | mmu-miR-489-3p  | Rhoj     | -2.47 | 1.69  |
| InoR/Sham | mmu-miR-488-3p  | Rnf125   | -2.17 | 2.57  |
| InoR/Sham | mmu-miR-489-3p  | Rnf125   | -2.47 | 2.57  |
| InoR/Sham | mmu-miR-224-5p  | Rnf125   | -3.47 | 2.57  |
| InoR/Sham | mmu-miR-335-5p  | Rnf125   | -3.30 | 2.57  |
| InoR/Sham | mmu-miR-224-5p  | Rnf146   | -3.47 | 1.93  |
| InoR/Sham | mmu-miR-489-3p  | Robo4    | -2.47 | 1.64  |
| InoR/Sham | mmu-miR-540-3p  | Rpgrip1l | 2.68  | -1.65 |
| InoR/Sham | mmu-let-7d-5p   | Rpgrip1l | 2.93  | -1.65 |
| InoR/Sham | mmu-miR-467d-5p | Rpgrip1l | 2.46  | -1.65 |
| InoR/Sham | mmu-miR-452-5p  | Rpgrip1l | 1.88  | -1.65 |
| InoR/Sham | mmu-miR-674-5p  | Rpgrip1l | 2.40  | -1.65 |
| InoR/Sham | mmu-miR-770-3p  | Rpp38    | 7.81  | -1.68 |

|           |                 |          |       |       |
|-----------|-----------------|----------|-------|-------|
| InoR/Sham | mmu-miR-467d-5p | Rpp38    | 2.46  | -1.68 |
| InoR/Sham | mmu-miR-335-5p  | Rrh      | -3.30 | 2.27  |
| InoR/Sham | mmu-miR-488-3p  | Rsad2    | -2.17 | 1.51  |
| InoR/Sham | mmu-miR-335-5p  | Rsad2    | -3.30 | 1.51  |
| InoR/Sham | mmu-miR-540-3p  | Rsl1     | 2.68  | -1.85 |
| InoR/Sham | mmu-miR-770-3p  | Rsl1     | 7.81  | -1.85 |
| InoR/Sham | mmu-miR-467d-5p | Rsl1     | 2.46  | -1.85 |
| InoR/Sham | mmu-miR-874-3p  | Rsl1     | 4.55  | -1.85 |
| InoR/Sham | mmu-miR-452-5p  | Rsl1     | 1.88  | -1.85 |
| InoR/Sham | mmu-let-7d-5p   | Rsl1     | 2.93  | -1.85 |
| InoR/Sham | mmu-miR-224-5p  | Rtl1     | -3.47 | 1.54  |
| InoR/Sham | mmu-miR-190a-5p | Runx1    | -2.22 | 1.52  |
| InoR/Sham | mmu-miR-335-5p  | Runx1    | -3.30 | 1.52  |
| InoR/Sham | mmu-miR-452-5p  | Senp7    | 1.88  | -1.53 |
| InoR/Sham | mmu-miR-467d-5p | Senp7    | 2.46  | -1.53 |
| InoR/Sham | mmu-miR-674-5p  | Senp8    | 2.40  | -2.13 |
| InoR/Sham | mmu-let-7d-5p   | Senp8    | 2.93  | -2.13 |
| InoR/Sham | mmu-let-7d-5p   | Serpnb6b | 2.93  | -1.63 |
| InoR/Sham | mmu-miR-540-3p  | Serpnb6b | 2.68  | -1.63 |
| InoR/Sham | mmu-miR-674-5p  | Serpnb6b | 2.40  | -1.63 |
| InoR/Sham | mmu-miR-542-5p  | Serpnb8  | 3.09  | -1.63 |
| InoR/Sham | mmu-miR-540-3p  | Serpnb8  | 2.68  | -1.63 |
| InoR/Sham | mmu-miR-674-5p  | Serpnb8  | 2.40  | -1.63 |
| InoR/Sham | mmu-miR-540-3p  | Serpnb9  | 2.68  | -1.62 |
| InoR/Sham | mmu-miR-770-3p  | Serpnb9  | 7.81  | -1.62 |
| InoR/Sham | mmu-miR-193a-3p | Serpnb9  | 6.27  | -1.62 |
| InoR/Sham | mmu-miR-488-3p  | Sfrp4    | -2.17 | 1.63  |
| InoR/Sham | mmu-miR-224-5p  | Sik1     | -3.47 | 1.53  |
| InoR/Sham | mmu-miR-674-5p  | Slc10a7  | 2.40  | -1.50 |
| InoR/Sham | mmu-let-7d-5p   | Slc10a7  | 2.93  | -1.50 |
| InoR/Sham | mmu-miR-467d-5p | Slc10a7  | 2.46  | -1.50 |
| InoR/Sham | mmu-miR-744-5p  | Slc10a7  | 3.70  | -1.50 |
| InoR/Sham | mmu-miR-335-5p  | Slc15a3  | -3.30 | 1.53  |
| InoR/Sham | mmu-miR-674-5p  | Slc19a3  | 2.40  | -1.53 |
| InoR/Sham | mmu-miR-452-5p  | Slc38a9  | 1.88  | -1.64 |
| InoR/Sham | mmu-let-7d-5p   | Slc38a9  | 2.93  | -1.64 |
| InoR/Sham | mmu-miR-540-3p  | Slc38a9  | 2.68  | -1.64 |
| InoR/Sham | mmu-miR-674-5p  | Slc38a9  | 2.40  | -1.64 |

|           |                 |          |       |       |
|-----------|-----------------|----------|-------|-------|
| InoR/Sham | mmu-miR-193a-3p | Slc38a9  | 6.27  | -1.64 |
| InoR/Sham | mmu-miR-540-3p  | Slc39a2  | 2.68  | -1.73 |
| InoR/Sham | mmu-miR-674-5p  | Slc39a2  | 2.40  | -1.73 |
| InoR/Sham | mmu-let-7d-5p   | Slc7a11  | 2.93  | -1.61 |
| InoR/Sham | mmu-miR-674-5p  | Slc7a11  | 2.40  | -1.61 |
| InoR/Sham | mmu-miR-452-5p  | Slc7a11  | 1.88  | -1.61 |
| InoR/Sham | mmu-miR-540-3p  | Slc7a11  | 2.68  | -1.61 |
| InoR/Sham | mmu-miR-874-3p  | Slc7a11  | 4.55  | -1.61 |
| InoR/Sham | mmu-miR-467d-5p | Slco1a4  | 2.46  | -2.10 |
| InoR/Sham | mmu-miR-674-5p  | Slco1a4  | 2.40  | -2.10 |
| InoR/Sham | mmu-miR-674-5p  | Slco1c1  | 2.40  | -1.72 |
| InoR/Sham | mmu-miR-467d-5p | Slitrk2  | 2.46  | -1.63 |
| InoR/Sham | mmu-miR-467d-5p | Slitrk6  | 2.46  | -1.58 |
| InoR/Sham | mmu-miR-488-3p  | Socs3    | -2.17 | 2.08  |
| InoR/Sham | mmu-miR-488-3p  | Sox4     | -2.17 | 1.96  |
| InoR/Sham | mmu-miR-335-5p  | Spsb1    | -3.30 | 1.62  |
| InoR/Sham | mmu-miR-540-3p  | Srek1ip1 | 2.68  | -1.66 |
| InoR/Sham | mmu-miR-770-3p  | Srek1ip1 | 7.81  | -1.66 |
| InoR/Sham | mmu-let-7d-5p   | Srek1ip1 | 2.93  | -1.66 |
| InoR/Sham | mmu-miR-542-5p  | Srek1ip1 | 3.09  | -1.66 |
| InoR/Sham | mmu-miR-874-3p  | Srek1ip1 | 4.55  | -1.66 |
| InoR/Sham | mmu-miR-190a-5p | Stc1     | -2.22 | 1.59  |
| InoR/Sham | mmu-miR-224-5p  | Stc1     | -3.47 | 1.59  |
| InoR/Sham | mmu-miR-874-3p  | Stradb   | 4.55  | -1.53 |
| InoR/Sham | mmu-miR-540-3p  | Stradb   | 2.68  | -1.53 |
| InoR/Sham | mmu-miR-674-5p  | Stradb   | 2.40  | -1.53 |
| InoR/Sham | mmu-miR-744-5p  | Stxbp4   | 3.70  | -1.59 |
| InoR/Sham | mmu-miR-452-5p  | Stxbp4   | 1.88  | -1.59 |
| InoR/Sham | mmu-miR-193a-3p | Stxbp4   | 6.27  | -1.59 |
| InoR/Sham | mmu-miR-874-3p  | Stxbp4   | 4.55  | -1.59 |
| InoR/Sham | mmu-miR-540-3p  | Stxbp4   | 2.68  | -1.59 |
| InoR/Sham | mmu-miR-467d-5p | Stxbp4   | 2.46  | -1.59 |
| InoR/Sham | mmu-miR-674-5p  | Stxbp4   | 2.40  | -1.59 |
| InoR/Sham | mmu-miR-770-3p  | Sult1a1  | 7.81  | -1.52 |
| InoR/Sham | mmu-miR-335-5p  | Taf5l    | -3.30 | 1.57  |
| InoR/Sham | mmu-miR-335-5p  | Tas2r135 | -3.30 | 2.59  |
| InoR/Sham | mmu-miR-488-3p  | Tas2r135 | -2.17 | 2.59  |

|           |                 |          |       |       |
|-----------|-----------------|----------|-------|-------|
| InoR/Sham | mmu-miR-190a-5p | Tas2r135 | -2.22 | 2.59  |
| InoR/Sham | mmu-miR-224-5p  | Tas2r143 | -3.47 | 2.40  |
| InoR/Sham | mmu-miR-674-5p  | Tax1bp3  | 2.40  | -1.60 |
| InoR/Sham | mmu-miR-770-3p  | Tax1bp3  | 7.81  | -1.60 |
| InoR/Sham | mmu-let-7d-5p   | Tfb1m    | 2.93  | -2.05 |
| InoR/Sham | mmu-miR-874-3p  | Tfb1m    | 4.55  | -2.05 |
| InoR/Sham | mmu-miR-540-3p  | Tfb1m    | 2.68  | -2.05 |
| InoR/Sham | mmu-miR-674-5p  | Thap2    | 2.40  | -2.60 |
| InoR/Sham | mmu-miR-452-5p  | Thap2    | 1.88  | -2.60 |
| InoR/Sham | mmu-miR-770-3p  | Thap2    | 7.81  | -2.60 |
| InoR/Sham | mmu-miR-488-3p  | Tlr7     | -2.17 | 1.53  |
| InoR/Sham | mmu-let-7d-5p   | Tm6sf2   | 2.93  | -1.73 |
| InoR/Sham | mmu-miR-335-5p  | Tmcc3    | -3.30 | 2.17  |
| InoR/Sham | mmu-miR-489-3p  | Tmcc3    | -2.47 | 2.17  |
| InoR/Sham | mmu-miR-193a-3p | Tmem107  | 6.27  | -1.54 |
| InoR/Sham | mmu-miR-770-3p  | Tmem119  | 7.81  | -1.58 |
| InoR/Sham | mmu-miR-874-3p  | Tmem119  | 4.55  | -1.58 |
| InoR/Sham | mmu-miR-674-5p  | Tmem119  | 2.40  | -1.58 |
| InoR/Sham | mmu-miR-542-5p  | Tmem119  | 3.09  | -1.58 |
| InoR/Sham | mmu-miR-452-5p  | Tmem126b | 1.88  | -2.27 |
| InoR/Sham | mmu-miR-467d-5p | Tmem126b | 2.46  | -2.27 |
| InoR/Sham | mmu-miR-770-3p  | Tmem126b | 7.81  | -2.27 |
| InoR/Sham | mmu-miR-540-3p  | Tmem126b | 2.68  | -2.27 |
| InoR/Sham | mmu-miR-193a-3p | Tmem126b | 6.27  | -2.27 |
| InoR/Sham | mmu-miR-874-3p  | Tmem126b | 4.55  | -2.27 |
| InoR/Sham | mmu-miR-674-5p  | Tmem173  | 2.40  | -1.54 |
| InoR/Sham | mmu-miR-193a-3p | Tmem173  | 6.27  | -1.54 |
| InoR/Sham | mmu-let-7d-5p   | Tmem173  | 2.93  | -1.54 |
| InoR/Sham | mmu-let-7d-5p   | Tmem177  | 2.93  | -1.66 |
| InoR/Sham | mmu-miR-540-3p  | Tmem177  | 2.68  | -1.66 |
| InoR/Sham | mmu-miR-488-3p  | Tnf      | -2.17 | 2.19  |
| InoR/Sham | mmu-miR-224-5p  | Tnfaip3  | -3.47 | 1.92  |
| InoR/Sham | mmu-miR-488-3p  | Tnfaip3  | -2.17 | 1.92  |
| InoR/Sham | mmu-miR-193a-3p | Trib2    | 6.27  | -1.65 |
| InoR/Sham | mmu-let-7d-5p   | Trib2    | 2.93  | -1.65 |
| InoR/Sham | mmu-miR-874-3p  | Trib2    | 4.55  | -1.65 |
| InoR/Sham | mmu-miR-674-5p  | Trib2    | 2.40  | -1.65 |
| InoR/Sham | mmu-miR-467d-5p | Trib2    | 2.46  | -1.65 |

|           |                 |           |       |       |
|-----------|-----------------|-----------|-------|-------|
| InoR/Sham | mmu-miR-335-5p  | Trim72    | -3.30 | 1.66  |
| InoR/Sham | mmu-miR-190a-5p | Trim72    | -2.22 | 1.66  |
| InoR/Sham | mmu-miR-190a-5p | Trp53inp1 | -2.22 | 2.40  |
| InoR/Sham | mmu-miR-335-5p  | Trp53inp1 | -3.30 | 2.40  |
| InoR/Sham | mmu-miR-489-3p  | Trp53inp1 | -2.47 | 2.40  |
| InoR/Sham | mmu-miR-674-5p  | Ttc21b    | 2.40  | -1.64 |
| InoR/Sham | mmu-miR-542-5p  | Ttc21b    | 3.09  | -1.64 |
| InoR/Sham | mmu-miR-874-3p  | Ttc21b    | 4.55  | -1.64 |
| InoR/Sham | mmu-miR-335-5p  | Tubb6     | -3.30 | 1.55  |
| InoR/Sham | mmu-miR-674-5p  | Tubd1     | 2.40  | -1.61 |
| InoR/Sham | mmu-miR-224-5p  | Txnip     | -3.47 | 2.70  |
| InoR/Sham | mmu-miR-193a-3p | Uba6      | 6.27  | -1.56 |
| InoR/Sham | mmu-miR-452-5p  | Uba6      | 1.88  | -1.56 |
| InoR/Sham | mmu-miR-770-3p  | Ubxn2b    | 7.81  | -1.63 |
| InoR/Sham | mmu-miR-452-5p  | Ubxn2b    | 1.88  | -1.63 |
| InoR/Sham | mmu-miR-874-3p  | Ubxn2b    | 4.55  | -1.63 |
| InoR/Sham | mmu-miR-674-5p  | Ubxn2b    | 2.40  | -1.63 |
| InoR/Sham | mmu-let-7d-5p   | Ubxn2b    | 2.93  | -1.63 |
| InoR/Sham | mmu-miR-874-3p  | Ugt8a     | 4.55  | -1.55 |
| InoR/Sham | mmu-miR-452-5p  | Ugt8a     | 1.88  | -1.55 |
| InoR/Sham | mmu-miR-770-3p  | Ugt8a     | 7.81  | -1.55 |
| InoR/Sham | mmu-miR-770-3p  | Uppt      | 7.81  | -1.53 |
| InoR/Sham | mmu-miR-674-5p  | Uppt      | 2.40  | -1.53 |
| InoR/Sham | mmu-let-7d-5p   | Uppt      | 2.93  | -1.53 |
| InoR/Sham | mmu-miR-452-5p  | Uppt      | 1.88  | -1.53 |
| InoR/Sham | mmu-miR-467d-5p | Usp31     | 2.46  | -1.76 |
| InoR/Sham | mmu-miR-540-3p  | Usp31     | 2.68  | -1.76 |
| InoR/Sham | mmu-miR-193a-3p | Usp31     | 6.27  | -1.76 |
| InoR/Sham | mmu-miR-452-5p  | Usp31     | 1.88  | -1.76 |
| InoR/Sham | mmu-miR-874-3p  | Usp31     | 4.55  | -1.76 |
| InoR/Sham | mmu-miR-770-3p  | Usp31     | 7.81  | -1.76 |
| InoR/Sham | mmu-miR-489-3p  | Usp36     | -2.47 | 1.60  |
| InoR/Sham | mmu-miR-193a-3p | Vmn2r86   | 6.27  | -1.80 |
| InoR/Sham | mmu-miR-744-5p  | Vprbp     | 3.70  | -1.52 |
| InoR/Sham | mmu-miR-467d-5p | Vprbp     | 2.46  | -1.52 |
| InoR/Sham | mmu-miR-489-3p  | Wdhd1     | -2.47 | 1.56  |
| InoR/Sham | mmu-miR-674-5p  | Wdr92     | 2.40  | -1.66 |
| InoR/Sham | mmu-miR-874-3p  | Wdr92     | 4.55  | -1.66 |

|           |                 |         |       |       |
|-----------|-----------------|---------|-------|-------|
| InoR/Sham | mmu-miR-540-3p  | Wdr92   | 2.68  | -1.66 |
| InoR/Sham | mmu-miR-489-3p  | Zbtb16  | -2.47 | 1.64  |
| InoR/Sham | mmu-miR-224-5p  | Zbtb16  | -3.47 | 1.64  |
| InoR/Sham | mmu-miR-770-3p  | Zbtb26  | 7.81  | -1.50 |
| InoR/Sham | mmu-miR-874-3p  | Zbtb26  | 4.55  | -1.50 |
| InoR/Sham | mmu-miR-674-5p  | Zbtb26  | 2.40  | -1.50 |
| InoR/Sham | mmu-let-7d-5p   | Zbtb26  | 2.93  | -1.50 |
| InoR/Sham | mmu-let-7d-5p   | Zfp111  | 2.93  | -1.52 |
| InoR/Sham | mmu-miR-452-5p  | Zfp111  | 1.88  | -1.52 |
| InoR/Sham | mmu-miR-193a-3p | Zfp111  | 6.27  | -1.52 |
| InoR/Sham | mmu-miR-674-5p  | Zfp111  | 2.40  | -1.52 |
| InoR/Sham | mmu-miR-874-3p  | Zfp111  | 4.55  | -1.52 |
| InoR/Sham | mmu-miR-193a-3p | Zfp113  | 6.27  | -1.81 |
| InoR/Sham | mmu-miR-770-3p  | Zfp113  | 7.81  | -1.81 |
| InoR/Sham | mmu-miR-452-5p  | Zfp113  | 1.88  | -1.81 |
| InoR/Sham | mmu-miR-674-5p  | Zfp113  | 2.40  | -1.81 |
| InoR/Sham | mmu-let-7d-5p   | Zfp113  | 2.93  | -1.81 |
| InoR/Sham | mmu-miR-467d-5p | Zfp113  | 2.46  | -1.81 |
| InoR/Sham | mmu-miR-452-5p  | Zfp160  | 1.88  | -1.64 |
| InoR/Sham | mmu-miR-193a-3p | Zfp160  | 6.27  | -1.64 |
| InoR/Sham | mmu-miR-674-5p  | Zfp160  | 2.40  | -1.64 |
| InoR/Sham | mmu-miR-874-3p  | Zfp160  | 4.55  | -1.64 |
| InoR/Sham | mmu-miR-467d-5p | Zfp160  | 2.46  | -1.64 |
| InoR/Sham | mmu-miR-193a-3p | Zfp229  | 6.27  | -1.54 |
| InoR/Sham | mmu-miR-452-5p  | Zfp229  | 1.88  | -1.54 |
| InoR/Sham | mmu-miR-874-3p  | Zfp329  | 4.55  | -1.59 |
| InoR/Sham | mmu-miR-540-3p  | Zfp329  | 2.68  | -1.59 |
| InoR/Sham | mmu-miR-674-5p  | Zfp354b | 2.40  | -1.52 |
| InoR/Sham | mmu-miR-874-3p  | Zfp354b | 4.55  | -1.52 |
| InoR/Sham | mmu-miR-744-5p  | Zfp354b | 3.70  | -1.52 |
| InoR/Sham | mmu-let-7d-5p   | Zfp354b | 2.93  | -1.52 |
| InoR/Sham | mmu-miR-770-3p  | Zfp418  | 7.81  | -1.94 |
| InoR/Sham | mmu-miR-540-3p  | Zfp418  | 2.68  | -1.94 |
| InoR/Sham | mmu-miR-674-5p  | Zfp418  | 2.40  | -1.94 |
| InoR/Sham | mmu-miR-452-5p  | Zfp418  | 1.88  | -1.94 |
| InoR/Sham | mmu-miR-674-5p  | Zfp420  | 2.40  | -1.64 |
| InoR/Sham | mmu-miR-452-5p  | Zfp420  | 1.88  | -1.64 |
| InoR/Sham | mmu-miR-540-3p  | Zfp426  | 2.68  | -1.55 |
| InoR/Sham | mmu-miR-674-5p  | Zfp426  | 2.40  | -1.55 |

|           |                 |        |      |       |
|-----------|-----------------|--------|------|-------|
| InoR/Sham | mmu-let-7d-5p   | Zfp455 | 2.93 | -1.97 |
| InoR/Sham | mmu-miR-452-5p  | Zfp455 | 1.88 | -1.97 |
| InoR/Sham | mmu-miR-467d-5p | Zfp455 | 2.46 | -1.97 |
| InoR/Sham | mmu-miR-674-5p  | Zfp563 | 2.40 | -1.56 |
| InoR/Sham | mmu-miR-540-3p  | Zfp58  | 2.68 | -1.74 |
| InoR/Sham | mmu-let-7d-5p   | Zfp583 | 2.93 | -1.56 |
| InoR/Sham | mmu-miR-193a-3p | Zfp595 | 6.27 | -1.88 |
| InoR/Sham | mmu-miR-674-5p  | Zfp595 | 2.40 | -1.88 |
| InoR/Sham | mmu-miR-674-5p  | Zfp60  | 2.40 | -1.80 |
| InoR/Sham | mmu-miR-467d-5p | Zfp60  | 2.46 | -1.80 |
| InoR/Sham | mmu-miR-193a-3p | Zfp709 | 6.27 | -1.56 |
| InoR/Sham | mmu-let-7d-5p   | Zfp709 | 2.93 | -1.56 |
| InoR/Sham | mmu-miR-770-3p  | Zfp709 | 7.81 | -1.56 |
| InoR/Sham | mmu-miR-452-5p  | Zfp709 | 1.88 | -1.56 |
| InoR/Sham | mmu-miR-540-3p  | Zfp709 | 2.68 | -1.56 |
| InoR/Sham | mmu-miR-770-3p  | Zfp719 | 7.81 | -2.21 |
| InoR/Sham | mmu-let-7d-5p   | Zfp719 | 2.93 | -2.21 |
| InoR/Sham | mmu-miR-452-5p  | Zfp719 | 1.88 | -2.21 |
| InoR/Sham | mmu-miR-674-5p  | Zfp719 | 2.40 | -2.21 |
| InoR/Sham | mmu-miR-674-5p  | Zfp72  | 2.40 | -2.50 |
| InoR/Sham | mmu-miR-452-5p  | Zfp72  | 1.88 | -2.50 |
| InoR/Sham | mmu-let-7d-5p   | Zfp72  | 2.93 | -2.50 |
| InoR/Sham | mmu-miR-874-3p  | Zfp72  | 4.55 | -2.50 |
| InoR/Sham | mmu-let-7d-5p   | Zfp759 | 2.93 | -2.23 |
| InoR/Sham | mmu-miR-540-3p  | Zfp759 | 2.68 | -2.23 |
| InoR/Sham | mmu-miR-467d-5p | Zfp790 | 2.46 | -1.53 |
| InoR/Sham | mmu-miR-540-3p  | Zfp790 | 2.68 | -1.53 |
| InoR/Sham | mmu-miR-874-3p  | Zfp790 | 4.55 | -1.53 |
| InoR/Sham | mmu-let-7d-5p   | Zfp825 | 2.93 | -1.96 |
| InoR/Sham | mmu-miR-674-5p  | Zfp825 | 2.40 | -1.96 |
| InoR/Sham | mmu-miR-467d-5p | Zfp825 | 2.46 | -1.96 |
| InoR/Sham | mmu-miR-542-5p  | Zfp825 | 3.09 | -1.96 |
| InoR/Sham | mmu-miR-193a-3p | Zfp825 | 6.27 | -1.96 |
| InoR/Sham | mmu-miR-452-5p  | Zfp825 | 1.88 | -1.96 |
| InoR/Sham | mmu-miR-874-3p  | Zfp825 | 4.55 | -1.96 |
| InoR/Sham | mmu-miR-452-5p  | Zfp84  | 1.88 | -1.51 |
| InoR/Sham | mmu-miR-193a-3p | Zfp84  | 6.27 | -1.51 |

|           |                  |               |      |       |
|-----------|------------------|---------------|------|-------|
| InoR/Sham | mmu-miR-542-5p   | Zfp84         | 3.09 | -1.51 |
| InoR/Sham | mmu-miR-874-3p   | Zfp846        | 4.55 | -1.58 |
| InoR/Sham | mmu-let-7d-5p    | Zfp846        | 2.93 | -1.58 |
| InoR/Sham | mmu-miR-674-5p   | Zfp846        | 2.40 | -1.58 |
| InoR/Sham | mmu-miR-193a-3p  | Zfp846        | 6.27 | -1.58 |
| InoR/Sham | mmu-miR-452-5p   | Zfp873        | 1.88 | -1.62 |
| InoR/Sham | mmu-miR-770-3p   | Zfp873        | 7.81 | -1.62 |
| InoR/Sham | mmu-miR-674-5p   | Zfp873        | 2.40 | -1.62 |
| InoR/Sham | mmu-miR-674-5p   | Zfp874b       | 2.40 | -1.67 |
| InoR/Sham | mmu-miR-452-5p   | Zfp874b       | 1.88 | -1.67 |
| IR/Sham   | mmu-miR-296-3p   | 1110057K04Rik | 3.02 | -1.64 |
| IR/Sham   | mmu-miR-455-3p.1 | Abca9         | 4.28 | -1.72 |
| IR/Sham   | mmu-miR-370-3p   | Banp          | 2.07 | -1.54 |
| IR/Sham   | mmu-miR-455-3p.1 | Banp          | 4.28 | -1.54 |
| IR/Sham   | mmu-miR-296-3p   | Car2          | 3.02 | -1.69 |
| IR/Sham   | mmu-miR-467e-5p  | Car2          | 2.43 | -1.69 |
| IR/Sham   | mmu-miR-455-3p.1 | Car2          | 4.28 | -1.69 |
| IR/Sham   | mmu-miR-296-3p   | Chordc1       | 3.02 | -1.62 |
| IR/Sham   | mmu-miR-467e-5p  | Chordc1       | 2.43 | -1.62 |
| IR/Sham   | mmu-miR-669a-3p  | Chordc1       | 4.43 | -1.62 |
| IR/Sham   | mmu-miR-370-3p   | Chordc1       | 2.07 | -1.62 |
| IR/Sham   | mmu-miR-296-3p   | Cx3cr1        | 3.02 | -1.67 |
| IR/Sham   | mmu-miR-669a-3p  | Dguok         | 4.43 | -1.73 |
| IR/Sham   | mmu-miR-370-3p   | Dusp19        | 2.07 | -1.60 |
| IR/Sham   | mmu-miR-669a-3p  | Dusp19        | 4.43 | -1.60 |
| IR/Sham   | mmu-miR-455-3p.1 | Dusp19        | 4.28 | -1.60 |
| IR/Sham   | mmu-miR-296-3p   | E330009J07Rik | 3.02 | -1.53 |
| IR/Sham   | mmu-miR-370-3p   | E330009J07Rik | 2.07 | -1.53 |
| IR/Sham   | mmu-miR-455-3p.1 | E330009J07Rik | 4.28 | -1.53 |
| IR/Sham   | mmu-miR-455-3p.1 | Ermn          | 4.28 | -1.54 |
| IR/Sham   | mmu-miR-370-3p   | Ermn          | 2.07 | -1.54 |

|         |                  |          |      |       |
|---------|------------------|----------|------|-------|
| IR/Sham | mmu-miR-669a-3p  | Fam173b  | 4.43 | -1.51 |
| IR/Sham | mmu-miR-455-3p.1 | Fam173b  | 4.28 | -1.51 |
| IR/Sham | mmu-miR-296-3p   | Fam173b  | 3.02 | -1.51 |
| IR/Sham | mmu-miR-370-3p   | Fam173b  | 2.07 | -1.51 |
| IR/Sham | mmu-miR-467e-5p  | Fam173b  | 2.43 | -1.51 |
| IR/Sham | mmu-miR-296-3p   | Fmo1     | 3.02 | -1.54 |
| IR/Sham | mmu-miR-455-3p.1 | Fmo1     | 4.28 | -1.54 |
| IR/Sham | mmu-miR-467e-5p  | Fmo1     | 2.43 | -1.54 |
| IR/Sham | mmu-miR-467e-5p  | Gpr17    | 2.43 | -2.20 |
| IR/Sham | mmu-miR-296-3p   | Gpr17    | 3.02 | -2.20 |
| IR/Sham | mmu-miR-370-3p   | Gpr6     | 2.07 | -1.60 |
| IR/Sham | mmu-miR-455-3p.1 | Gpr6     | 4.28 | -1.60 |
| IR/Sham | mmu-miR-296-3p   | Itm2a    | 3.02 | -1.59 |
| IR/Sham | mmu-miR-669a-3p  | Kctd21   | 4.43 | -2.36 |
| IR/Sham | mmu-miR-370-3p   | Kctd21   | 2.07 | -2.36 |
| IR/Sham | mmu-miR-296-3p   | Kctd21   | 3.02 | -2.36 |
| IR/Sham | mmu-miR-455-3p.1 | Mrpl36   | 4.28 | -2.23 |
| IR/Sham | mmu-miR-296-3p   | Mrpl36   | 3.02 | -2.23 |
| IR/Sham | mmu-miR-370-3p   | Mrpl36   | 2.07 | -2.23 |
| IR/Sham | mmu-miR-455-3p.1 | Ndufa2   | 4.28 | -1.57 |
| IR/Sham | mmu-miR-370-3p   | Nipa1    | 2.07 | -1.52 |
| IR/Sham | mmu-miR-669a-3p  | Nipa1    | 4.43 | -1.52 |
| IR/Sham | mmu-miR-467e-5p  | Nipa1    | 2.43 | -1.52 |
| IR/Sham | mmu-miR-467e-5p  | Nudt5    | 2.43 | -1.72 |
| IR/Sham | mmu-miR-370-3p   | Prelp    | 2.07 | -1.57 |
| IR/Sham | mmu-miR-455-3p.1 | Prelp    | 4.28 | -1.57 |
| IR/Sham | mmu-miR-467e-5p  | Ptpn2    | 2.43 | -1.97 |
| IR/Sham | mmu-miR-669a-3p  | Ptpn2    | 4.43 | -1.97 |
| IR/Sham | mmu-miR-370-3p   | Rasgrp3  | 2.07 | -1.78 |
| IR/Sham | mmu-miR-467e-5p  | Rpgrip1l | 2.43 | -1.69 |

|         |                  |           |      |       |
|---------|------------------|-----------|------|-------|
| IR/Sham | mmu-miR-467e-5p  | Serpinb6b | 2.43 | -1.54 |
| IR/Sham | mmu-miR-296-3p   | Slc22a8   | 3.02 | -1.66 |
| IR/Sham | mmu-miR-467e-5p  | Slc39a2   | 2.43 | -1.70 |
| IR/Sham | mmu-miR-455-3p.1 | Slc39a2   | 4.28 | -1.70 |
| IR/Sham | mmu-miR-467e-5p  | Slc40a1   | 2.43 | -1.58 |
| IR/Sham | mmu-miR-455-3p.1 | Tek       | 4.28 | -1.87 |
| IR/Sham | mmu-miR-296-3p   | Tmem119   | 3.02 | -1.55 |
| IR/Sham | mmu-miR-669a-3p  | Tmem119   | 4.43 | -1.55 |
| IR/Sham | mmu-miR-370-3p   | Tmem119   | 2.07 | -1.55 |
| IR/Sham | mmu-miR-370-3p   | Tubd1     | 2.07 | -1.64 |
| IR/Sham | mmu-miR-455-3p.1 | Ubxn2b    | 4.28 | -1.53 |
| IR/Sham | mmu-miR-370-3p   | Ubxn2b    | 2.07 | -1.53 |
| IR/Sham | mmu-miR-296-3p   | Ubxn2b    | 3.02 | -1.53 |
| IR/Sham | mmu-miR-669a-3p  | Wdr78     | 4.43 | -1.56 |
| IR/Sham | mmu-miR-370-3p   | Wdr78     | 2.07 | -1.56 |
| IR/Sham | mmu-miR-296-3p   | Wdr78     | 3.02 | -1.56 |
| IR/Sham | mmu-miR-467e-5p  | Wdr78     | 2.43 | -1.56 |

**Table S9. Predicted mRNA targets of candidate stroke miRNAs in mice.**

| miRNA:mRNA  | Tnf | Gprc5a | Ccl3 | Atf3 | Fosb | Jun | Ptgs2 | Cxcl1 | Socs3 | Ccr12 | Zfp36a | Cxcl2 |
|-------------|-----|--------|------|------|------|-----|-------|-------|-------|-------|--------|-------|
| miR-302b-3p | 1   | 0      | 0    | 1    | 1    | 0   | 0     | 0     | 0     | 0     | 0      | 0     |
| miR-296-5p  | 0   | 0      | 0    | 0    | 0    | 0   | 0     | 0     | 0     | 1     | 0      | 0     |
| miR-489-3p  | 0   | 0      | 1    | 0    | 0    | 0   | 0     | 0     | 0     | 0     | 0      | 0     |
| miR-224-5p  | 0   | 0      | 0    | 2    | 1    | 0   | 0     | 0     | 0     | 0     | 0      | 0     |
| miR-181b-5p | 1   | 0      | 0    | 0    | 0    | 0   | 0     | 0     | 0     | 0     | 0      | 0     |
| miR-367-3p  | 1   | 1      | 0    | 0    | 0    | 1   | 1     | 0     | 0     | 1     | 0      | 0     |
